1 **Title:**

2 Neutrophil-derived extracellular vesicles: proinflammatory trails and anti-inflammatory  
3 microvesicles

4

5 **Authors:**

6 Young-Jin Youn<sup>1,†</sup>, Sanjeeb Shrestha<sup>1,†</sup>, Jun-Kyu Kim<sup>1</sup>, Yu-Bin Lee<sup>1</sup>, Jee Hyun Lee<sup>2</sup>, Keun Hur<sup>2</sup>,  
7 Nanda Maya Mali<sup>3</sup>, Sung-Wook Nam<sup>4</sup>, Sun-Hwa Kim<sup>1</sup>, Dong-Keun Song<sup>5</sup>, Hee Kyung Jin<sup>6,7</sup>,  
8 Jae-sung Bae<sup>1,7</sup>, Chang-Won Hong<sup>1,\*</sup>

9

10 **Affiliations:**

11 <sup>1</sup>*Department of Physiology, School of Medicine, Kyungpook National University, Daegu, 41944,*  
12 *Republic of Korea.*

13 <sup>2</sup>*Department of Biochemistry and Cell Biology, School of Medicine, Kyungpook National*  
14 *University, Daegu, 41944, Republic of Korea*

15 <sup>3</sup>*Department of Anatomy, School of Medicine, Kyungpook National University, Daegu, 41944,*  
16 *Republic of Korea*

17 <sup>4</sup>*Department of Molecular Medicine, School of Medicine, Kyungpook National University,*  
18 *Daegu, 41944, Republic of Korea*

19 <sup>5</sup>*Department of Pharmacology, College of Medicine, Hallym University, Chuncheon, 24252,*  
20 *Republic of Korea.*

21 <sup>6</sup>*Department of Laboratory Animal Medicine, College of Veterinary Medicine, Kyungpook*  
22 *National University, Daegu, 41944, Republic of Korea.*

23 <sup>7</sup>*Stem Cell Neuroplasticity Research Group, Kyungpook National University, Daegu, 41944,*

1 *Republic of Korea*

2

3 **\*Correspondence to:**

4 Chang-Won Hong, M.D., Ph.D.

5 E-mail: [cwhong@knu.ac.kr](mailto:cwhong@knu.ac.kr)

6 Department of Physiology, School of Medicine, Kyungpook National University

7 680 Gukchaeborang-ro, Daegu 41944, Republic of Korea

8 Tel 82-53-420-4812

9

10 **†These authors contributed equally to this work.**

11

12 **Running title:**

13 Different functions of neutrophil extracellular vesicles

14

15 **Word counts**

16 **Abstract:** 210

17 **Main text:** 7747

18

19 **Figure count:** 6

20 **Table count:** 0

21 **Reference count:** 70

22 **Scientific category:** Immunology; Innate immunity; Neutrophils

23

1 **Keywords:** EV, extracellular vesicle; NDMV, neutrophil-derived microvesicle; NDTR, neutrophil-  
2 derived trail

3

4 **Abbreviations:** EV, extracellular vesicle; NDMV, neutrophil-derived microvesicles; NDTR, neutrophil-  
5 derived trails; NK cells, natural killer cells; MoDCs, monocyte-derived dendritic cells; CXCL12, CXC-  
6 chemokine ligand 12; PAMPs, pathogen-associated molecular patterns; fMLP, formyl-methionyl-leucyl-  
7 phenylalanine; LPS, lipopolysaccharide; *E. coli*, *Escherichia coli*; *S. aureus*, *Staphylococcus aureus*;  
8 DAMPs, danger-associated molecular patterns; HMGB1, high mobility group box 1; TNF- $\alpha$ , tumor  
9 necrosis factor- $\alpha$ ; IFN- $\gamma$ , interferon- $\gamma$ ; TGF- $\beta$ , tumor growth factor- $\beta$ ; IL-4, interleukin-4; L-NAME,  
10 N( $\gamma$ )-nitro-L-arginine methyl ester; PMA, phorbol 12-myristate 13-acetate; MCP-1, monocyte  
11 chemoattractant protein 1; iNOS, inducible nitric oxide synthase

12

### 13 **Key points**

- 14 • Neutrophil-derived trails are proinflammatory extracellular vesicles that induce M1  
15 macrophage polarization and protect against inflammation
- 16 • Neutrophil-derived microvesicles are anti-inflammatory extracellular vesicles that induce M2  
17 macrophage polarization

## 1 **SUMMARY**

2 Extracellular vesicles (EVs) are membrane-derived vesicles that mediate intercellular  
3 communications. Neutrophils produce different subtypes of EVs during inflammatory responses.  
4 Neutrophil-derived trails (NDTRs) are generated by neutrophils migrating toward inflammatory  
5 foci, whereas neutrophil-derived microvesicles (NDMVs) are thought to be generated by  
6 neutrophils that have arrived at the inflammatory foci. However, the physical and functional  
7 characteristics of neutrophil-derived EVs are incompletely understood. In this study, we  
8 investigated the similarities and differences between neutrophil-derived EV subtypes.  
9 Neutrophil-derived EVs shared similar characteristics regarding stimulators, generation  
10 mechanisms, and surface marker expression. Both neutrophil-derived EV subtypes exhibited  
11 similar functions, such as direct bactericidal activity and induction of monocyte chemotaxis via  
12 MCP-1. However, NDTR generation was dependent on the integrin signaling, while NDMV  
13 generation was dependent on the PI3K pathway. The CD16 expression level differentiated the  
14 neutrophil-derived EV subtypes. Interestingly, both subtypes showed different patterns of  
15 miRNA expression and were easily phagocytosed by monocytes. NDTRs induced M1  
16 macrophage polarization, whereas NDMVs induced M2 macrophage polarization. Moreover,  
17 NDTRs but not NDMVs exerted protective effects against sepsis-induced lethality in a murine  
18 sepsis model and pathological changes in a murine chronic colitis model. These results suggest a  
19 new insight into neutrophil-derived EV subtypes: proinflammatory NDTRs and anti-  
20 inflammatory NDMVs.

## 1 INTRODUCTION

2 Extracellular vesicles (EVs) are membrane-derived vesicles surrounded by lipid bilayers  
3 (Théry et al., 2009; van der Pol et al., 2015). Since EVs express various ligands and receptors  
4 originating from their source cells and transport various molecules to their target cells (van der  
5 Pol et al., 2015), they are considered to be important mediators of intercellular communications.  
6 Neutrophils, the professional phagocytes, also produce EVs in response to various stimulators.  
7 Since the first discovery of membrane-containing vesicles released from neutrophils (Stein and  
8 Luzio, 1991), neutrophil-derived EVs have been called by different names, such as ectosomes  
9 (Duarte et al., 2012; Eken et al., 2010; 2013; Gasser et al., 2003; Hess et al., 1999),  
10 microparticles (Dalli et al., 2008; Gasser and Schifferli, 2005; Y. Hong et al., 2012; Kambas et  
11 al., 2014; Mesri and Altieri, 1999; 1998; Nieuwland et al., 2000; Nolan et al., 2008; Pitanga et al.,  
12 2014; Pliyev et al., 2014; Pluskota et al., 2008; Prakash et al., 2012; Slater et al., 2017), and  
13 microvesicles (Headland et al., 2015; Rhys et al., 2018; Timar et al., 2013). These vesicles are  
14 thought to be generated through membrane blebbing and shedding (Duarte et al., 2012; Nolan et  
15 al., 2008; Stein and Luzio, 1991) and conform to the general description of EVs (van der Pol et  
16 al., 2015). Recently, a specialized type of neutrophil-derived EVs was discovered and called  
17 trails (Lim et al., 2015). During migration through inflamed tissue, the uropods of neutrophils are  
18 elongated by adhesion to the endothelium (Hyun et al., 2012). These elongated uropods detach  
19 from the cell bodies, finally leaving chemokine-containing EVs (Lim et al., 2015). Hence,  
20 neutrophil-derived EVs can be categorized into two subtypes according to the mechanism of  
21 generation: neutrophil-derived microvesicles (NDMV) and neutrophil-derived trails (NDTRs).  
22 NMDVs are the classical type of neutrophil-derived EVs. Neutrophils generate NDMVs either  
23 spontaneously (Gasser and Schifferli, 2005; Mesri and Altieri, 1999) or in response to bacterial

1 stimulation (Dalli et al., 2013; Eken et al., 2013; 2010; 2008; Hess et al., 1999; Mesri and Altieri,  
2 1999; 1998; Pliyev et al., 2014; Pluskota et al., 2008; Slater et al., 2017; Timar et al., 2013).  
3 Various immunological stimuli, such as cytokines (Headland et al., 2015; Mesri and Altieri,  
4 1999), chemokines (Pliyev et al., 2014), complement components (Pliyev et al., 2014; Stein and  
5 Luzio, 1991), and antibodies (Y. Hong et al., 2012; Kambas et al., 2014), also induce the  
6 production of NDMVs. Fluorescence-activated cell sorting (FACS) analysis and electron  
7 microscopic analysis showed that NDMVs are small (less than 1  $\mu\text{m}$  in diameter) enclosed  
8 vesicles (Dalli et al., 2008; Duarte et al., 2012; Headland et al., 2015; Kambas et al., 2014;  
9 Pliyev et al., 2014; Prakash et al., 2012; Slater et al., 2017) surrounded with a double-layered  
10 membrane (Gasser et al., 2003; Hess et al., 1999). Phosphatidylserine is exposed in the outer  
11 layer of the membrane (Dalli et al., 2013; Eken et al., 2010; Gasser, 2004; Kambas et al., 2014;  
12 Nolan et al., 2008; Pitanga et al., 2014; Pliyev et al., 2014; Slater et al., 2017; Stein and Luzio,  
13 1991; Timar et al., 2013) and various adhesion molecules, such as integrin  $\alpha\text{M}$  (Dalli et al., 2013;  
14 Gasser et al., 2003; Y. Hong et al., 2012; Pluskota et al., 2008; Prakash et al., 2012; Slater et al.,  
15 2017), integrin  $\beta$  (Dalli et al., 2013), and L-selectins (Dalli et al., 2008; Gasser et al., 2003;  
16 Pitanga et al., 2014), are expressed on the surface. In addition, NDMVs contain protease-  
17 enriched granules (Dalli et al., 2013; Gasser et al., 2003; Hess et al., 1999; Y. Hong et al., 2012;  
18 Kambas et al., 2014; Mesri and Altieri, 1999; Pitanga et al., 2014; Slater et al., 2017) and express  
19 markers of neutrophil granules (Dalli et al., 2013; Gasser et al., 2003; Gasser and Schifferli, 2005;  
20 Headland et al., 2015; Hess et al., 1999; Y. Hong et al., 2012; Nieuwland et al., 2000; Pitanga et  
21 al., 2014; Prakash et al., 2012). The primary function of NDMVs is to modulate the  
22 inflammatory functions of neighboring cells. NDMVs enhance the expression of  
23 proinflammatory genes in endothelial cells (Y. Hong et al., 2012; Mesri and Altieri, 1998) and

1 increase coagulation by inducing the aggregations of platelets and red blood cells (Gasser and  
2 Schifferli, 2005; Pluskota et al., 2008). NDMVs limit the growth of bacteria by inducing  
3 bacterial aggregation (Timar et al., 2013), deliver myeloperoxidase to endothelial cells (Mesri  
4 and Altieri, 1999), and increase phagocytosis by macrophages (Duarte et al., 2012). Moreover,  
5 NDMVs control inflammatory responses by modulating inflammatory gene expression in natural  
6 killer (NK) cells (Pliyev et al., 2014), monocyte-derived dendritic cells (moDCs) (Eken et al.,  
7 2008), macrophages (Eken et al., 2013; 2010; Gasser, 2004; Rhys et al., 2018), and chondrocytes  
8 (Headland et al., 2015). A recent study showed that NDMVs increased mortality in a murine  
9 model of sepsis by decreasing macrophage activation (Johnson et al., 2017).

10 NDTRs are a recently identified subtype of neutrophil-derived EV. In contrast to NDMVs,  
11 NDTRs are generated from neutrophils during extravasation from blood vessels into inflamed  
12 tissue (Hyun et al., 2012; Lim et al., 2015). Migrating neutrophils bind to endothelial cells via  
13 various adhesion molecules, including integrins (Hyun and C.-W. Hong, 2017; Nauseef and  
14 Borregaard, 2014). Therefore, physical forces between neutrophils and endothelial cells elongate  
15 the uropods of migrating neutrophils (Hyun et al., 2012), leading to the detachment of the tail  
16 portion (Lim et al., 2015). The detached tail portion contains CXC-chemokine ligand 12  
17 (CXCL12) which guides CD8<sup>+</sup> T cells to the influenza-infected tissues (Lim et al., 2015).

18 Despite these advances in our understanding of neutrophil-derived EVs, the similarities and  
19 differences between NDTRs and NDMVs are not fully understood. The most important  
20 difference between NDTRs and NDMVs seems to be the spatiotemporal generation mechanism;  
21 NDTRs are generated from neutrophils migrating toward inflammatory foci, whereas NDMVs  
22 are generated from neutrophils that have arrived at inflammatory foci. Based on this difference,  
23 we hypothesized that NDTRs and NDMVs play different roles in modulating immune responses.

1 Here, we investigated the similarities and differences between NDTRs and NDMVs. Although  
2 neutrophil-derived EVs were indistinguishable with respect to several characteristics, we found  
3 that NDTRs exert proinflammatory effects, whereas NDMVs exert anti-inflammatory effects.



## 1 **RESULTS**

### 2 **Various stimulators induce the formation of both NDTRs and NDMVs**

3 To identify specific stimulators that induce the formation of NDTRs and NDMVs, we  
4 examined the effects of various stimulators on formation of these EVs. The stimulators were  
5 categorized into the following subgroups: (i) pathogen-associated molecular patterns (PAMPs):  
6 formyl-methionyl-leucyl-phenylalanine (fMLP), lipopolysaccharide (LPS), opsonized *E. coli*,  
7 and opsonized *S. aureus*; (ii) danger-associated molecular patterns (DAMPs): high mobility  
8 group box 1 (HMGB1), complement component 5a (C5a), and S100 calcium binding protein B  
9 (S100B); (iii) inflammatory cytokines: tumor necrosis factor- $\alpha$  (TNF- $\alpha$ ) and interferon- $\gamma$  (IFN- $\gamma$ );  
10 (iv) anti-inflammatory or immunosuppressive cytokines: tumor growth factor- $\beta$  (TGF- $\beta$ ) and  
11 interleukin-4 (IL-4); and (v) exogenous compounds: N( $\gamma$ )-nitro-L-arginine methyl ester (L-  
12 NAME) and phorbol 12-myristate 13-acetate (PMA). To visualize EV formation, neutrophils  
13 were stained with cell tracker green and live-cell fluorescence images were obtained. All  
14 stimulators induced the formation of NDTRs from neutrophils in the fibronectin-coated  
15 chemotaxis chamber (Figure 1A, Supplementary movie 1). The stimulated neutrophils exhibited  
16 elongated uropods (Figure 1A, arrows), which were subsequently detached from the cell bodies,  
17 forming NDTRs (Figure 1A, arrowheads). Intriguingly, all stimulators also induced the  
18 formation of NDMVs from neutrophils in the uncoated confocal dish (Figure 1A, Supplementary  
19 movie 2). Live-cell fluorescence imaging showed the membrane blebbing and shedding of  
20 membranes (Figure 1A, arrowheads), the membranes finally detached, forming NDMVs. The  
21 relative amounts of NDTRs and NDMVs were quantified using a spectrofluorometer (Figure 1B  
22 and 1C). These results suggest that the generation of NDTRs and NDMVs by the  
23 abovementioned stimulators is indistinguishable.

1 To further investigate the mechanism underlying NDTR and NDMV formation, we examined the  
2 effects of various inhibitors on the formation these EVs (Figure 1D). Neutrophils were allowed  
3 to generate neutrophil-derived EVs in response to fMLP in the presence or the absence of  
4 various signaling pathway inhibitors. PD90859 (an ERK inhibitor), SB203580 (a p38 MAPK  
5 inhibitor), BAPTA-AM (a calcium chelator), CaCCinh (a Ca<sup>2+</sup>-activated Cl<sup>-</sup> channel  
6 transmembrane protein 16A inhibitor), Tat-C3 (a Rho inhibitor), NSC23766 (a Rac1 inhibitor),  
7 and ML141 (a Cdc42 inhibitor) attenuated the formation of both NDTRs and NDMVs (Figure  
8 1E). However, wortmannin [a phosphatidylinositol 3-kinase (PI3K) inhibitor] significantly  
9 attenuated the formation of NDMVs but not NDTRs (Figure 1D). Moreover, IMB10 (an  
10 inhibitor of integrin  $\alpha$ M and MAC-1) significantly inhibited the formation of NDTRs but slightly  
11 attenuated the formation of NDMVs (Figure 1D). These results suggest that NDTRs and  
12 NDMVs share a common mechanism of generation but that integrin signaling and PI3K-  
13 dependent exocytosis pathways are required for the generation of NDTRs and NDMVs,  
14 respectively.

15

### 16 **CD16 expression differentiates NDTRs from NDMVs**

17 Next, we assessed the expression of surface markers on NDMVs and NDTRs. FACS analysis  
18 indicated that both NDTRs and NDMVs expressed the surface markers of general EVs (Lötvall  
19 et al., 2014), such as annexins [Annexin V (AnnV) and annexin A1 (AnnA<sub>1</sub>)] and tetraspanins  
20 (CD9 and CD81) in response to various stimulators (Figure 1E, Supplementary Figure 1). To  
21 further confirm that these EVs were neutrophil-specific, the expression of neutrophil-specific  
22 markers on EVs isolated from fMLP-stimulated neutrophils was examined. Both NDTRs and  
23 NDMVs isolated from fMLP-stimulated neutrophils expressed high levels of neutrophil granule

1 markers: CD63 (primary granules), CD66b (secondary granules), and CD35 (tertiary granules)  
2 (Figure 1E). The adhesion molecule expression analysis showed that all integrin markers were  
3 expressed at high levels in neutrophil-derived EVs: CD11b (integrin  $\alpha$ M), CD49d (integrin  $\alpha$ 4),  
4 and CD29 (integrin  $\beta$ 1), and CD18 (integrin  $\beta$ 2) (Figure 1E). Moreover, both NDTRs and  
5 NDMVs contained heat shock protein (HSP70) and monocyte chemoattractant protein 1 (MCP-1)  
6 (Figure 1E). Interestingly, NDTRs and NDMVs showed different levels of CD16 (an Fc $\gamma$  type III  
7 receptor) expression. CD16 expression was high in NDMVs but negligible in NDTRs (Figure  
8 1E). Neutrophil-derived EVs isolated from neutrophils stimulated with C5a, TNF- $\alpha$ , or PMA  
9 showed surface marker expression patterns similar to those of EVs isolated from fMLP-  
10 simulated neutrophils (Figure 1E). Notably, the CD16 expression level was consistently higher in  
11 NDMVs than in NDTRs. Bacteria-induced NDTRs and NDMVs showed the similar patterns but  
12 reduced extents of surface marker expression. TGF- $\beta$ -induced NDTRs and NDMVs showed  
13 similar patterns of surface marker expression except for the reciprocal expression of CD16 in  
14 NDTRs (Figure 1E).

15 Next, we evaluated the sizes and numbers of NDTRs and NDMVs. Nanoparticle tracking  
16 analysis (NTA) revealed heterogeneity in the size distribution of spontaneously generated  
17 neutrophil-derived EVs (Figure 1F). The diameter of spontaneously generated neutrophil-derived  
18 EVs was between 50 and 600 nm, with a mean diameter of 200 nm. The sizes and diameters of  
19 neutrophil-derived EVs isolated from fMLP-simulated neutrophils were not significantly  
20 different from those of spontaneously generated neutrophil-derived EVs (spontaneous vs fMLP-  
21 simulated: NDTR,  $246.7 \pm 10.80$  nm vs  $226.5 \pm 14.11$  nm; NDMV,  $227.2 \pm 9.32$  nm vs  $211.5 \pm$   
22  $13.47$  nm). To further identify the characteristics of NDTRs and NDMVs, we investigated their  
23 contents and found that both subtypes of EVs contained RNA and protein but not DNA (Figure

1 1G and Supplementary Figure 2A). The concentrations of proteins retained in NDTRs and  
2 NDMVs varied according to the stimulation (Supplementary Figure 2B and 2C). Collectively,  
3 these results suggest that neutrophil-derived EVs are defined as AnnV<sup>+</sup> AnnA1<sup>+</sup> CD9<sup>+</sup> CD63<sup>+</sup>  
4 CD66b<sup>+</sup> CD35<sup>+</sup> CD11b<sup>+</sup> CD49d<sup>+</sup> CD29<sup>+</sup> CD18<sup>+</sup> EVs that are loaded with RNA and proteins.  
5 Furthermore, the expression levels of CD16 differentiated NDTRs (CD16<sup>low</sup>) from NDMVs  
6 (CD16<sup>High</sup>).

7

### 8 **Both NDTRs and NDMVs have direct bactericidal activity**

9 A previous study reported that NDMVs inhibit the growth of bacteria by inducing bacterial  
10 aggregation (Timar et al., 2013). Since neutrophil-derived EVs expressed neutrophil granules,  
11 we next examined the bactericidal activity of these EVs. Neutrophils were stimulated with either  
12 *E. coli* or *S. aureus*, and EVs were isolated. Then, *E. coli* and *S. aureus* were exposed to  
13 equivalent amounts of neutrophil-derived EVs, and the direct bactericidal activity of the  
14 neutrophil-derived EVs was assessed (Figure 2A). Both NDTRs and NDMVs showed significant  
15 bactericidal activity against *E. coli* and *S. aureus* (Figure 2B). Neutrophil-derived EVs are  
16 composed of plasma membranes and carry substantial amounts of proteins and RNA, hence, we  
17 hypothesized that the continual production of neutrophil-derived EVs might negatively influence  
18 the overall bactericidal efficiency of remnant neutrophils (RNs). Therefore, we examined the  
19 bactericidal activity of RNs after the generation of neutrophil-derived EVs. Neutrophils were  
20 allowed to generate either NDTRs, NDMVs, or both, and the bactericidal activity of RNs was  
21 examined (Figure 2A). Interestingly, RNs exhibited the significantly diminished bactericidal  
22 activity against *E. coli* and *S. aureus* (Figure 2C), suggesting that neutrophil-derived EVs might  
23 be involved in the general bactericidal activity of neutrophils.

1 Neutrophils exert their bactericidal activity through the release of reactive oxygen species  
2 (ROS), granules, and neutrophil extracellular traps (NETs) (Nauseef and Borregaard, 2014). We  
3 thus evaluated the mechanism underlying the bactericidal activity of neutrophil-derived EVs by  
4 inhibiting each pathway of bactericidal activity. The NADPH oxidase inhibitor  
5 (diphenyleneiodonium, DPI) and protease inhibitor (PI) cocktail significantly attenuated the  
6 bactericidal activity of neutrophil-derived EVs (Figure 2D and 2E). However, DNase, an  
7 inhibitor of NETs, did not inhibit the bactericidal activity of neutrophil-derived EVs (Figure 2D  
8 and 2E). A luminol assay showed that both NDTRs and NDMVs generate ROS in response to  
9 PMA stimulation (Supplementary Figure 2E). Collectively, these results suggest that both  
10 NDTRs and NDMVs exert bactericidal activity via ROS- and granule-dependent mechanisms.

11

### 12 **Both NDMVs and NDTRs induce monocyte chemotaxis**

13 The primary function of NDTRs is to guide influenza-specific CD8<sup>+</sup> T cells to the site of  
14 infection through retained CXCL12 (Lim et al., 2015). Since we found MCP-1 expression in  
15 NDTRs and NDMVs, the effects of neutrophil-derived EVs on the chemotaxis of monocytes and  
16 macrophages were examined. One side of a chemotaxis chamber was coated with NDTRs by  
17 allowing neutrophils to move toward various chemoattractants (Figure 3A, left panel).  
18 Monocytes and macrophages were isolated from peripheral mononuclear cells (PBMCs), and  
19 their chemotaxis toward NDTRs was examined (Figure 3B, direct NDTR). Monocytes showed  
20 significant chemotaxis in NDTR-coated chemotaxis chamber (Figure 3B, direct NDTR), while  
21 macrophages did not exhibit significant movements (Supplementary Figure 3A and 3B).  
22 Moreover, in a chemotaxis chamber coated with isolated NDTRs and NDMVs, monocytes  
23 exhibited efficient chemotaxis toward neutrophil-derived EVs (Figure 3A and 3B, isolated

1 NDTRs/NDMV). However, the pharmacological inhibition of CXCR2, a receptor for MCP-1,  
2 completely abolished the migration of monocytes toward to NDTRs and NDMVs (Figure 3B,  
3 +MCP-1 inhibitor). These results suggest that neutrophil-derived EVs induce monocyte  
4 chemotaxis in an MCP-1-dependent manner. Additionally, NDTRs and NDMVs induce  
5 neutrophil chemotaxis and LY223982 (a leukotriene B<sub>4</sub> antagonist) completely inhibited  
6 neutrophil chemotaxis (Supplementary Figure 3C and 3D).

7

### 8 **NDTRs and NDMVs differentially induce the polarization of monocytes into different** 9 **phenotypes**

10 Previous studies have shown that NDMVs exert anti-inflammatory responses by suppressing  
11 the activation of immune cells such as dendritic cells (Eken et al., 2008), monocytes (Prakash et  
12 al., 2012), and macrophages (Duarte et al., 2012; Eken et al., 2013; 2010; Gasser, 2004; Johnson  
13 et al., 2017). Since NDMVs are generated from neutrophils in tissues (Eken et al., 2013;  
14 Headland et al., 2015; Rhys et al., 2018; Slater et al., 2017), these EVs might be involved in  
15 limiting excessive inflammation by suppressing neighboring immune cells. However, NDTRs  
16 are produced during extravasation toward inflammatory foci (Hyun et al., 2012; Lim et al., 2015);  
17 hence, we hypothesized that NDTRs might stimulate the following immune cells to prepare for  
18 pathogen defense. Therefore, we compared the effects of NDTRs and NDMVs on the phenotypic  
19 polarization of monocytes into macrophages.

20 To evaluate this hypothesis, we first investigated the direct interactions between neutrophil-  
21 derived EVs and monocytes. THP-1 cells, human monocytic cell line, were differentiated into  
22 M0 macrophages by stimulation with PMA (100 ng/ml, 48 h) and were exposed to neutrophil-  
23 derived EVs in a microfluidic chamber. M0 cells actively migrated toward neutrophil-derived

1 EVs and phagocytosed them (Figure 4A, Supplementary movie 3 and 4). The phagocytosis of  
2 neutrophil EVs by M0 macrophages was further confirmed by FACS analysis (Figure 4B).

3 Next, we evaluated the effects of NDTRs and NDMVs on the phenotypic polarization of  
4 macrophages. THP-1 cells were differentiated into M0 macrophages and further exposed to  
5 either NDTRs or NDMVs (Figure 4C). For comparison, M0-differentiated THP-1 cells were  
6 incubated with either LPS/IFN- $\gamma$  or IL-4/IL-13 for differentiation into M1 or M2 macrophages,  
7 respectively (Figure 4C). Interestingly, NDTRs and NDMVs differentially induced the  
8 phenotypic polarization of M0-differentiated THP-1 cells. NDTR-exposed M0 cells showed  
9 increased expression of phenotypic markers of proinflammatory macrophages, such as inducible  
10 nitric oxide synthase (iNOS), IL-12, and TNF- $\alpha$  (Figure 4D and 4E). However, NDTR exposure  
11 also induced the upregulation of phenotype markers of anti-inflammatory macrophages, such as  
12 arginase-1 (Arg-1), IL-10 and TGF- $\beta$  (Figure 4D and 4E). Furthermore, NDTR-treated M0  
13 macrophages showed the reduced expression of CD23 with increased expression of CD163 and  
14 CD206 (Figure 4D and 4E). Although these results indicate that NDTR-treated macrophages did  
15 not exhibit the classical patterns of M1/M2 markers, recent studies suggest that the surface  
16 marker expression patterns of macrophages polarized toward M1 by exogenous compounds do  
17 not always follow those for classical M1 macrophages (Lee et al., 2017; Xu et al., 2016; Zhang  
18 et al., 2018). Therefore, we defined the phenotype of NDTR-treated macrophages as M1-like  
19 macrophages based on the expression of important functional markers of M1 macrophages, such  
20 as iNOS, TNF- $\alpha$ , and IL-12, in NDTR-treated macrophages.

21 However, NDMV-exposed M0 macrophages showed different patterns of phenotypic marker  
22 expression. NDMV-treated M0 macrophages showed the increased expression of anti-  
23 inflammatory markers such as TGF- $\beta$ , IL-10, and Arg-1, with increased expression of CD163,

1 CD206, CD80, and CD86 (Figure 4D and 4E). Moreover, these cells showed reduced expression  
2 of CD23 (Figure 4E) and lacked the expression of CD1a (data not shown). Collectively, these  
3 results suggest that NDMVs induce the differentiation of M0 macrophages into M2 macrophages,  
4 which are important for tissue remodeling and immunoregulation (Martinez and Gordon, 2014).  
5 When undifferentiated THP-1 cells were directly exposed to neutrophil-derived EVs, neither  
6 their morphology (Supplementary Figure 4B) nor their expression of M1/M2 markers  
7 (Supplementary Figure 4C-D) significantly changed.

8

### 9 **miRNAs are differentially expressed in NDTRs and NDMVs**

10 miRNAs are small noncoding RNA molecules that posttranscriptionally regulate gene  
11 expression. Various miRNAs are found in EVs and are considered to be important mediators of  
12 intercellular communications (Camussi et al., 2010; Valadi et al., 2007; van der Pol et al., 2012).  
13 Since recent studies indicate that miRNAs play a pivotal role in the phenotypic polarization of  
14 macrophages (Graff et al., 2012; O'Connell et al., 2010; Saha et al., 2016), we performed  
15 miRNA sequencing (miRNA-seq) on neutrophil-derived EVs. Agilent Human miRNA  
16 Microarray assay was performed on the neutrophil-derived EVs isolated from six volunteers  
17 (Figure 5A). The hierarchical clustering shows the differential miRNA expression patterns  
18 between NDTRs and NDMVs (Figure 5B). Furthermore, analysis of differentially expressed  
19 miRNAs (adjusted p-value < 0.05, fold change  $\geq$  1.5) identified 40 miRNAs with significantly  
20 different expression levels in NDTRs and NDMVs (Figure 5A). Among the top 10 differentially  
21 expressed miRNAs, six miRNAs (miR-122-5p, miR-1260a, miR-1285-5p, miR-24-3p, miR-29a-  
22 3p, and miR-4454+miR7975) were highly expressed in NDTRs, while three miRNAs (miR-126-  
23 3p, miR-150-5p, and miR-451a) were highly expressed in NDMVs (Figure 5C). Next, qRT-PCR



1 analysis was conducted to validate the differential miRNA expression in neutrophil-derived EVs.  
2 Cel-miR-39 was added to the samples during the RNA extraction step and was used as an  
3 exogenous control for normalization. We found that four miRNAs (miR-1260, miR-1285, miR-  
4 4454, and miR-7975) were highly expressed in NDTRs, while three miRNAs (miR-126, miR-  
5 150, and miR-451a) were highly expressed in NDMVs (Figure 5D). To further confirm the  
6 involvement of miRNAs in macrophage polarization, M0-differentiated THP-1 cells were  
7 transfected with mimics of miRNAs differently expressed in NDTRs and NDMVs. Interestingly,  
8 the transfection with miRNA mimics highly expressed in NDTRs (miR-1260a, miR-1285-5p,  
9 miR-4454, and miR-7975) enhanced iNOS expressions in M0-differentiated THP-1 cells (Figure  
10 5E). In contrast, the transfection with miRNA mimics highly expressed in NDMVs (miR-150-5p  
11 and miR-451a) enhanced arginase expressions in M0-differentiated THP-1 cells (Figure 5E).

12

### 13 **NDTRs exert protective effects against acute and chronic inflammation**

14 Because NDTRs and NDMVs exerted different effects on the phenotypic polarization of  
15 macrophages, we next evaluated the clinical implication of NDTRs and NDMVs in the murine  
16 models of acute and chronic inflammation. We employed an experimental sepsis model (cecal-  
17 ligation and puncture, CLP) to establish murine model of acute inflammation (Park et al., 2017)  
18 and a chronic dextran sulfate sodium (DSS)-induced colitis model to establish a murine model of  
19 chronic inflammation (Marcon et al., 2013). BALB/c mice were treated intraperitoneally with  
20 either NDTRs or NDMVs 30 min prior to CLP surgery and further treated on days 1, 2, and 3  
21 after CLP surgery. NDTR-treated mice showed increased survival, while NDMV-treated mice  
22 did not show any survival benefit (Figure 6A). To establish a chronic inflammation model, mice  
23 were orally administered with two cycles of 2% DSS as previously described (Marcon et al.,

1 2013). Either NDTRs or NDMVs were administered intraperitoneally on days 16, 18, 20, and 22  
2 (Figure 6B). Interestingly, NDTRs significantly reduced colon length, while NDMVs had no  
3 effect (Figure 6C). Moreover, NDTR treatment significantly reduced colon damage (Figure  
4 6D).

5 To further confirm the clinical relevance of neutrophil-derived EVs, we examined the  
6 existence of NDTRs and NDMVs in serum of sepsis patients. Serum was obtained from 12 septic  
7 patients admitted to the intensive care units due to community-acquired pneumonia. Interestingly,  
8 the percentages of both NDTRs (AnnV<sup>+</sup> CD16<sup>-</sup>) and NDMVs (AnnV<sup>+</sup> CD16<sup>+</sup>) were higher in  
9 serum of sepsis patients than in that of healthy volunteers (Figure 6E).

## 1 **DISCUSSION**

2 In this study, we investigated the similarities and differences between neutrophil-derived EVs  
3 and found that NDTRs and NDMVs have many similarities. Both were generated by the same  
4 stimulators (Figure 1A-C), shared the mechanism of generation (Figure 1D), and showed similar  
5 marker expression patterns (Figure 1E) and physical characteristics (Figure 1F-1H). Moreover,  
6 both NDTRs and NDMVs exerted similar functions. Both showed direct bactericidal activity  
7 (Figure 2), induced monocyte chemotaxis via MCP-1 (Figure 3) and were phagocytosed by  
8 monocytes (Figure 4A and 4B). However, we found profound differences between NDTRs and  
9 NDMVs. First, NDMVs were distinguished from NDTRs by the expression levels of CD16  
10 (Figure 1E). In addition, although NDTRs and NDMVs share a common mechanism of  
11 generation, the generation of NDTRs depends on integrin signaling, while the generation of  
12 NDMVs depends on the PI3K pathway (Figure 1D). Moreover, NDTRs and NDMVs showed  
13 different patterns of miRNA expression (Figure 5A-E) and induced the phenotypic polarization  
14 of monocytes into either proinflammatory or anti-inflammatory macrophages, respectively  
15 (Figure 4C-E, 5E). Finally, only NDTRs showed beneficial effects in murine models of acute  
16 and chronic inflammation (Figure 6).

17 "EVs" is an umbrella term encompassing all types of vesicles derived from prokaryotic and  
18 eukaryotic cells (van der Pol et al., 2015); hence, EVs consist of diverse subpopulations that can  
19 be discriminated by sizes, contents, and functions (Kowal et al., 2016; Tkach et al., 2017). Since  
20 NDTRs were discovered only recently, the detailed rationale for the classification of NDTRs as a  
21 distinct subtype of neutrophil-derived EVs is mandatory. Therefore, we first sought specific  
22 stimulators of NDTR and NDMV production. Previous studies identified various stimulators of  
23 NDMV generation: fMLP (Dalli et al., 2013; Eken et al., 2013; 2010; 2008; Hess et al., 1999;

1 Mesri and Altieri, 1999; 1998; Pliyev et al., 2014), LPS (Pluskota et al., 2008), C5a (Pliyev et al.,  
2 2014; Stein and Luzio, 1991), TNF- $\alpha$  (Headland et al., 2015; Timar et al., 2013), IL-8 (Headland  
3 et al., 2015; Mesri and Altieri, 1999; Pliyev et al., 2014), antinuclear cytoplasmic antibody (Y.  
4 Hong et al., 2012; Kambas et al., 2014), PMA (Headland et al., 2015; Hess et al., 1999; Mesri  
5 and Altieri, 1999; Pluskota et al., 2008; Slater et al., 2017; Timar et al., 2013), zymosan (Pliyev  
6 et al., 2014), mycobacteria (Duarte et al., 2012), meningococci (Nieuwland et al., 2000), and  
7 staphylococci (Timar et al., 2013). However, only a few stimulator of NDTR generation were  
8 found. fMLP and TNF- $\alpha$  are the only known stimulators of NDTR formation *in vitro* (Lim et al.,  
9 2015), and NDTRs are found in *in vivo* models of influenza virus infection (Lim et al., 2015) and  
10 bacterial infections (Hyun et al., 2012). However, contrary to our expectation, most  
11 immunological stimuli could induce both NDTR and NDMV formation. These results suggest  
12 that the generation of NDTRs and NDMVs is not determined by stimulators that neutrophils  
13 encounter during the inflammatory process. Therefore, we next investigated the differences in  
14 generation mechanism between NDTRs and NDMVs. Although neutrophil-derived EVs shared  
15 common mechanisms of generation (e.g., via ERK MAPK, p38 MAPK, Rho, Rac1, Cdc42, and  
16 extracellular Ca<sup>2+</sup>), we found that integrin signaling and the PI3K pathway were required for the  
17 generation of NDTRs and NDMVs, respectively (Figure 1D). Since NDTRs are generated from  
18 neutrophils during diapedesis from blood vessels toward inflammatory foci (Hyun et al., 2012;  
19 Lim et al., 2015), the adhesion molecules highly expressed in endothelial cells ensure the  
20 generation of NDTRs by neutrophils. In contrast, neutrophils generate NDMVs in an  
21 environment devoid of adhesion molecules. Therefore, these results suggest that the generation  
22 of NDTRs and NDMVs by neutrophils is dependent on the immunological environment, not the  
23 type of stimulation.

1 We next tried to identify the specific markers of NDTRs and NDMVs. Previous studies  
2 reported various markers of NDMVs: phosphatidylserine (Dalli et al., 2008; Eken et al., 2013;  
3 2010; Gasser, 2004; Kambas et al., 2014; Pitanga et al., 2014; Pliyev et al., 2014; Slater et al.,  
4 2017; Stein and Luzio, 1991; Timar et al., 2013), Annexin A<sub>1</sub> (Dalli et al., 2008; Headland et  
5 al., 2015), neutrophil granules (Gasser et al., 2003; Gasser and Schifferli, 2005; Headland et al.,  
6 2015; Hess et al., 1999; Y. Hong et al., 2012; Mesri and Altieri, 1999; Nieuwland et al., 2000;  
7 Pitanga et al., 2014; Prakash et al., 2012), adhesion molecules (Dalli et al., 2008; Gasser et al.,  
8 2003; Y. Hong et al., 2012; Pitanga et al., 2014; Pluskota et al., 2008; Prakash et al., 2012; Slater  
9 et al., 2017), and complement receptors (Gasser et al., 2003; Gasser and Schifferli, 2005; Hess et  
10 al., 1999). In contrast, very little is known about specific markers of NDTRs, except for integrin-  
11 associated molecules such as lymphocyte function-associated antigen 1 (LFA-1) and MAC-1  
12 (Hyun et al., 2012; Lim et al., 2015). Neutrophil-derived EVs shared most of markers. Both  
13 NDTRs and NDMVs expressed general EV markers (e.g., AnnV, AnnA1, CD9, and CD81),  
14 neutrophil-specific markers (e.g., CD63, CD66b, and CD35), and adhesion molecules (e.g.,  
15 CD11b, CD49d, CD29, and CD18); in addition, both contained certain functional molecules (e.g.,  
16 HSP and MCP-1). However, the expression level of CD16 distinguished NDTRs from NDMVs.  
17 NDMVs expressed relatively high levels of CD16 compared to those on NDTRs. CD16, an Fc $\gamma$   
18 type III receptor, is found on the surface of neutrophils (van de Winkel and Capel, 1993) and is  
19 preferentially distributed on the leading edge in migrating neutrophils (Seveau et al., 2001).  
20 NDTRs are generated from elongated uropods of migrating neutrophils; hence, the contribution  
21 of this physical characteristic to the generation mechanism might be responsible for the relatively  
22 low expression of CD16 on NDTRs.  
23 Notably, the expression levels of some markers of neutrophil-derived EVs varied according to

1 the stimulators. Although stimulation with TNF- $\alpha$ , C5a, and PMA induced marker expression  
2 patterns similar to those produced by fMLP, bacterial stimulation induced a marked reduction in  
3 the expression of almost all kinds of surface markers. Moreover, TGF- $\beta$  stimulation induced  
4 different patterns of surface marker expression in neutrophil-derived EVs. For example, CD11b  
5 expression was nearly abrogated in TGF- $\beta$ -induced neutrophil-derived EVs, and CD16  
6 expression levels were reciprocally increased in NDTRs. These changes according to specific  
7 stimuli suggest that neutrophils might generate different types of EVs according to the immune  
8 environment. In support of this hypothesis, previous studies identified the functional changes in  
9 NDMVs in response to the stimulation. Bacteria-induced NDMVs gained the ability to inhibit  
10 bacterial growth, whereas spontaneously generated NDMVs had no bactericidal activity (Timar  
11 et al., 2013). Moreover, NDMVs generated from mycobacteria-infected neutrophils inhibited  
12 macrophage activation, while spontaneously generated NDMVs did not significantly affect  
13 macrophage function (Duarte et al., 2012). Therefore, studying the function and phenotype of  
14 different neutrophil-derived EVs according to the different types of stimulation could be  
15 interesting.

16 To further investigate the functional differences between neutrophil-derived EVs, the  
17 bactericidal activity of these EVs was assessed. Both NDTRs and NDMVs directly killed  
18 bacteria via ROS- and granule-dependent mechanisms (Figure 2). Although a previous study  
19 showed that NDMVs limit bacterial growth by inducing bacterial aggregation {Timar: 2013da},  
20 the specific mechanism underlying the bactericidal activity of NDMVs is incompletely  
21 understood. Previous studies have reported that NDMVs can actively generate ROS {Pitanga:  
22 2014kp} {Hong: 2012de} and contain neutrophil granules such as myeloperoxidase (Gasser et  
23 al., 2003; Y. Hong et al., 2012; Slater et al., 2017), lactoferrin, elastase, and proteinase (Gasser et

1 al., 2003; Hess et al., 1999; Y. Hong et al., 2012; Mesri and Altieri, 1999). Therefore, ROS  
2 generation and protease-enriched granules are considered to be possible mechanisms of the direct  
3 bactericidal activity of NDMVs. Consistent with this hypothesis, NDMVs actively generate ROS  
4 in response to stimulation (Supplementary Figure 2E), and NADPH oxidase inhibitor  
5 significantly attenuated the bactericidal activity of NDMVs (Figure 2D and 2E). Moreover,  
6 NDMVs expressed granule markers (Figure 1E), and protease inhibitors significantly attenuated  
7 the bactericidal activity of NDMVs (Figure 2D and 2E). Interestingly, NDTRs also showed  
8 bactericidal activity via ROS- and granule-dependent mechanisms (Figure 2C). Additionally,  
9 NDTRs actively generated ROS in response to PMA stimulation (Supplementary Figure 2E) and  
10 expressed various granule markers (Figure 1E). Moreover, the bactericidal activity of NDTRs  
11 was significantly attenuated by the NADPH oxidase inhibitor and protease inhibitors (Figure 2D  
12 and 2E), suggesting that NDTRs not only guide the migration of immune cells to inflammatory  
13 foci but also provide a minimal defense against pathogens. Moreover, our results suggest that  
14 neutrophil-derived EVs might be involved in the general bactericidal activity of neutrophils  
15 (Figure 2C). After generating EVs, neutrophils exhibited a marked decrease in overall  
16 bactericidal activity, suggesting the development of an exhaustion state (Figure 2C). Neutrophils  
17 are exposed to various bacteria-derived products which are strong stimulators of neutrophil-  
18 derived EVs production. Therefore, neutrophils might be forced to produce EVs during classical  
19 phagocytosis-mediated bactericidal processes, and the bactericidal activity of neutrophil-derived  
20 EVs might be involved in the general bactericidal activity of neutrophils.

21 The primary function of EVs is to mediate intercellular communications (Camussi et al.,  
22 2010; Théry et al., 2009; van der Pol et al., 2012), and neutrophil-derived EVs also mediate cell-  
23 to-cell communications between neutrophils and neighboring cells. The results of previous

1 studies indicated that NDMVs induce anti-inflammatory functions in neighboring cells. NDMV-  
2 exposed NK cells exhibited increased expression of anti-inflammatory cytokines (Pliyev et al.,  
3 2014), and NDMVs inhibited the maturation of monocytes into dendritic cells (Pliyev et al.,  
4 2014). Moreover, NDMVs inhibit proinflammatory cytokine expression in monocytes,  
5 macrophages (Eken et al., 2013; 2010; Prakash et al., 2012; Rhys et al., 2018), and endothelial  
6 cells (Mesri and Altieri, 1999; 1998). In contrast, very little is known regarding the effects of  
7 NDTRs in cell-to-cell communications except that they guide following CD8<sup>+</sup> T cells and  
8 monocytes toward inflammatory foci (Lim et al., 2015). We found that neutrophil-derived EVs  
9 play a pivotal role in recruiting monocytes and skewing the differentiation of monocytes into  
10 either proinflammatory or anti-inflammatory macrophage. Both subtypes of neutrophil-derived  
11 EVs not only induced monocyte chemotaxis (Figure 3) and but also phagocytosed by monocytes  
12 (Figure 4A and 4B). Phagocytosed neutrophil-derived EVs showed differential effects on the  
13 phenotypic polarization of macrophages; NDTRs induced polarization toward a proinflammatory  
14 phenotype, whereas NDMVs induced polarization toward an anti-inflammatory phenotype  
15 (Figure 4C-E).

16 We found that miRNAs differentially expressed in NDTRs and NDMVs are responsible for  
17 macrophage polarizations into different phenotypes. Interestingly, most miRNAs found in  
18 NDTRs are associated with proinflammatory responses of macrophages, whereas most miRNAs  
19 found in NDMVs are associated with anti-inflammatory responses of macrophages. miR-1260a  
20 and miR-1285-5p are expressed in bacteria-infected macrophages (Derrick et al., 2017; 2013;  
21 Meng et al., 2014). miR-122-5p and miR-29a-3p induce proinflammatory gene expression in  
22 macrophages (Fabbri et al., 2012; Momen-Heravi et al., 2015). Moreover, miR-24-3p and miR-  
23 4454 are found in monocyte-derived dendritic cells (Fell et al., 2016) and alveolar macrophages



1 (Armstrong et al., 2017). In contrast, miR-126-3p and miR-150-5p are expressed in M2 polarized  
2 macrophages (Cobos Jiménez et al., 2014; Escate et al., 2016) and are associated with  
3 suppression of inflammation (Harris et al., 2008; Lin et al., 2018; Manoharan et al., 2014;  
4 Shantikumar et al., 2012). Our results showed differential miRNA expression in NDTRs and  
5 NDMVs; thus, neutrophils incorporate different types of miRNAs into EVs according to the  
6 immune environments. Since the adhesion molecules differentiate the generation mechanism of  
7 NDTRs and NDMVs, signaling associated with adhesion molecules could be an explanation for  
8 this phenomenon.

9       The reason that neutrophils generate different types of EVs is unknown. However, our  
10 findings suggest that neutrophils produce different types of EVs according to the immune  
11 environments to orchestrate inflammation. Successful inflammation requires effective initiation  
12 and resolution. Since neutrophils are the first cells recruited to sites of inflammation, they play a  
13 pivotal role in initiating inflammation (Amulic et al., 2012; Nauseef, 2016; Nauseef and  
14 Borregaard, 2014). Neutrophils actively participate in eliminating pathogens, guide following  
15 immune cells by releasing various kinds of chemokines and cytokines, and modulate the  
16 functions of neighboring immune cells (Nauseef, 2016; Soehnlein et al., 2017). Neutrophils also  
17 play an important role in the resolution of inflammation; they can persist at inflammatory foci  
18 during the entire process of inflammation and participate in the resolution of inflammation by  
19 releasing proresolving factors (Serhan et al., 2008). As discussed above, the most prominent  
20 difference between NDTRs and NDMVs is the spatiotemporal generation mechanism; NDTRs  
21 are generated from neutrophils migrating toward inflammatory foci, whereas NDMVs are  
22 generated from neutrophils that have arrived at inflammatory foci. Therefore, NDTRs might  
23 augment the proinflammatory responses of accompanying immune cells to combat imminent

1 inflammatory insults, whereas NDMVs might limit excessive inflammation by enhancing the  
2 anti-inflammatory responses of immune cells at inflammatory foci. In support of this idea,  
3 NDTRs demonstrated a profound beneficial effect in murine models of inflammation. NDTRs  
4 reduced lethality in the murine model of sepsis (Figure 6A) and pathological changes in the  
5 murine model of chronic colitis (Figure 6B-D). Moreover, NDTRs increased the number of  
6 proinflammatory macrophages in both murine inflammatory models. Therefore, we believe that  
7 neutrophils generate NDTRs during migration toward inflammatory foci to orchestrate the  
8 initiation of inflammation. In contrast, NDMVs did not demonstrate any beneficial effects in  
9 these murine models of inflammation, suggesting negligible effects of NDMVs on the overall  
10 outcome in our *in vivo* inflammation models. However, previous study showed the beneficial  
11 effect of NDMVs in chronic inflammation. The intra-articular injection of NDMVs decreased  
12 cartilage damage in a murine model of inflammatory arthritis by enhancing TGF- $\beta$  production  
13 from chondrocytes (Headland et al., 2015). Since our study showed that NDMVs promote M2  
14 macrophage polarization, it could be additional mechanism underlying the beneficial effect of  
15 NDMVs on inflammatory arthritis. However, additional *in vivo* studies are needed to verify the  
16 anti-inflammatory effects of NDMVs.

17 In conclusion, our study provides important insight into the differential functions of  
18 neutrophil-derived EVs; proinflammatory NDTRs and anti-inflammatory NDMVs. NDTRs  
19 guide monocytes and induce polarization toward proinflammatory macrophages, thereby  
20 contributing to the effective initiation of inflammation. On the other hand, NDMVs have similar  
21 characteristics to NDTRs, but they induce macrophage polarization into an anti-inflammatory  
22 phenotype. Therefore, modulating neutrophil-derived EV generation might be a new strategy for  
23 modulating inflammation.

## 1 **EXPERIMENTAL PROCEDURES**

2 ***Neutrophil Isolation.*** Human blood experiment was approved by Institutional Research Board of  
3 Kyungpook National University and Hallym University. Neutrophils were isolated as previously  
4 described (C.-W. Hong et al., 2010).

5

6 ***Live cell imaging of NDMV and NDTR formation.*** Neutrophils were stained with cell tracker  
7 and seeded in either confocal dish (SPL Life Sciences) for evaluation of NDMVs or  $\mu$ -slide  
8 chamber (ibidi) pre-coated with fibronectin (5  $\mu$ g/ml, Merck Millipore) for evaluation of NDTRs.  
9 Cells were treated with various stimulators for neutrophil EVs generation, and were visualized  
10 by immunofluorescence microscopy (Olympus IX83, Olympus). Neutrophils were stimulated  
11 with various stimulants: fMLP (1  $\mu$ M, Sigma-Aldrich), LPS (1  $\mu$ g/ml, Sigma-Aldrich), C5a (50  
12 ng/ml, Sino Biologicals), S100B (100 ng/ml, Sino Biologicals), HMGB1 (100 ng/ml, Sino  
13 Biologicals), TNF- $\alpha$  (50 ng/ml, Sino Biologicals), IFN- $\gamma$  (100 ng/ml, Sino Biologicals), TGF- $\beta$   
14 (20 ng/ml, Sino Biologicals), IL-4 (20 ng/ml, Sino Biologicals), PMA (100  $\mu$ g/ml, Sigma-  
15 Aldrich), and L-NAME (10  $\mu$ M; Tocris Bioscience).

16

17 ***Isolation of NDMV and NDTR.*** For isolation of NDMVs, supernatants were collected from  
18 stimulated neutrophils on uncoated culture plates. For isolation of NDTRs, neutrophils were  
19 stimulated on culture plate coated with fibronectin (5  $\mu$ g/ml) and adherent NDTRs were  
20 recovered by cell scraper. The purification of neutrophil EVs were performed by centrifugation  
21 at 2500 rpm and filtration through 1.2  $\mu$ m filter (Ministart Syringe Filter, Sartorius). The filtered  
22 EV-containing supernatants were ultra-centrifuged at 100,000  $\times$  g for 60 min at 4  $^{\circ}$ C. The pelleted

1 NDTRs and NDMVs were dissolved in 100  $\mu$ l phenol red-free RPMI and stored at -70 °C.

2

3 ***Quantification of NDMV and NDTR.*** EVs were isolated from neutrophils pre-stained with  
4 calcein-AM (20  $\mu$ g/ml, Merck Millipore). The calcein-AM fluorescence in neutrophil EVs were  
5 measured using Spectramax M2/e fluorescence microplate reader (Molecular Devices). For  
6 inhibition of neutrophil EVs generation, neutrophils were stimulated with fMLP (1  $\mu$ M) in  
7 presence of various inhibitors: calcium chelator (BAPTA-AM, 10  $\mu$ M, Tocris), inhibitor of  
8 calcium-activated chloride channel (CaCCinh-A01, 30 ng/ml, Sigma-Aldrich), inhibitor of Rho-  
9 A GTPase (Tat C3, 20 ng/ml, provided from Prof. J. Park in Hallym University), Inhibitor of  
10 Rac-1 GTPase (NSC23766, 10  $\mu$ M, Tocris bioscience), inhibitor of actin polymerization  
11 (Cytochalasin D, 50  $\mu$ g/ml, Sigma-Aldrich), inhibitor of PI3-Kinase (Wortmanin, 100 nM,  
12 Tocris), inhibitor of p38 MAP kinase (SB203580, 10  $\mu$ M, Tocris), inhibitor of ERK MAP kinase  
13 (PD90859, 10  $\mu$ M, Tocris), inhibitor of Cdc42 (ML141, 10  $\mu$ M, Tocris), inhibitor of  $\beta$ 1 integrin  
14 very late antigen (VLA-4) (Bio1211, 10  $\mu$ M, Tocris bioscience), inhibitor of macrophage-1  
15 (MAC-1) antigen, IMB10 (10  $\mu$ M, Sigma-Aldrich), inhibitors on the autophagic flux pathways  
16 (3-MA, 5  $\mu$ M, Sigma-Aldrich; chloroquine, 5  $\mu$ M, Sigma-Aldrich; bafilomycin, 5  $\mu$ M, Sigma-  
17 Aldrich), and inhibitors on the mTOR pathway (Rapamycin, 10 nM, Sigma-Aldrich).

18

19 ***Phenotyping of NDMV and NDTR using flow cytometry.*** Isolated EVs were fixed and stained  
20 with Annexin V (FITC, Abcam), FITC-conjugated Annexin A1 (Annexin A1, Bio Legend; FITC  
21 conjugate, Abcam), CD9 (FITC, Bio Legend), CD81 (FITC, Bio Legend), CD63 (FITC, BD  
22 biosciences), CD66b (FITC, BD biosciences), CD35 (PE, BD bioscience), CD11b (FITC,

1 Invitrogen), CD49d (FITC, Bio Legend), CD29 (PE, eBioscience), CD18 (PE, eBioscience), and  
2 CD16 (PE, BD biosciences). For intracellular staining, fixed neutrophil-derived EVs were  
3 permeabilized with phosflow perm buffer (BD biosciences), and stained with MCP (FITC,  
4 eBiosciences) and HSP (APC, Invitrogen).

5

6 ***Nanoparticle tracking analysis (NTA)***. Isolated EVs were re-suspended in PBS and further  
7 diluted for NTA analysis with the Nanosight LM10 nanoparticle characterization system  
8 (Malvern Instruments). NTA analytical software version 3 was used for capturing and analyzing  
9 data.

10

11 ***Bactericidal activity***. Opsonized *E. coli* (DH5 $\alpha$ ) and *S. aureus* (ATCC 25923) were exposed to  
12 EVs isolated from neutrophils stimulated with respective bacteria. For inhibition of bactericidal  
13 pathways, bacteria were exposed to EVs in presence of either protease inhibitor cocktail (Sigma-  
14 Aldrich), diphenylene iodonium (DPI, an inhibitor of reduced nicotinamide adenine dinucleotide  
15 phosphate oxidase, 10  $\mu$ M, Molecular Probes) , or DNase I (10  $\mu$ M, Bio basic Canada Inc.). For  
16 bactericidal activities of remnant neutrophils, neutrophils were allowed to generate neutrophil  
17 EVs in response to respective bacteria and the bactericidal activities of remnant neutrophils were  
18 measured.

19

20 ***Monocyte Isolation***. Monocytes were obtained from peripheral blood mononuclear cells  
21 (PBMCs) layer obtained after histopaque centrifugation by using percoll solution as described

1 previously (Repnik et al., 2003). Macrophages were differentiated from monocytes by incubation  
2 with granulocytes-macrophage colony stimulating factor (GM-CSF, 10 ng/ml, Bio Legend)

3

4 ***Chemotaxis assay.*** Migration of monocytes and macrophages against NDMV and NDTR were  
5 determined using  $\mu$ -slide chamber (ibidi) following manufacturer's instruction. The cell  
6 movement were visualized and captured by Nikon Eclipse Ni-U microscope using 20X objective.  
7 Cell movement was then analyzed using ImageJ (Schneider et al., 2012) and Chemotaxis and  
8 migration tool (ibidi).

9

10 ***Polarization of differentiated THP-1.*** THP-1 cells (Korean Cell Line Bank) were differentiated  
11 into M0 macrophages by treatment with PMA (100 ng/ml). M0-differentiated THP-1 cells were  
12 further exposed to neutrophil EVs which were isolated from fMLP-stimulated neutrophils. For  
13 control, M1 macrophages were induced by LPS (100 ng/ml) and IFN- $\gamma$  (10 ng/ml,  
14 Sinobiologicals), and M2 macrophages were induced by IL-4 (10 ng/ml, Sinobiologicals) and IL-  
15 12 (10 ng/ml, Sinobiologicals). Phenotypic markers for FACS analysis include CD14 (PerCP,  
16 BD biosciences), HLA-DR (APC, BD biosciences), CD80 (PE, Bio Legend), CD86 (PE, Bio  
17 Legend), CD209 (APC, Bio Legend), CD23 (APC, Bio Legend), CD163 (PE, Bio Legend),  
18 CD206 (FITC, BD biosciences), and CD1a (FITC, Bio Legend). For evaluation of cytokine  
19 expressions, RNA was extracted from THP-1 and cDNA was synthesized using RT<sup>2</sup> First strand  
20 kit (Qiagen). Pre-designed RT<sup>2</sup> qPCR primer assays (Qiagen) were used to determine the  
21 expression level of cytokines such as: iNOS (NOS2, PPH00173F), Arg-1 (PPH20977A), TNF- $\alpha$   
22 (PPH00341F), TGF- $\beta$ 1 (PPH00508A), IL-10 (PPH00572C), IL-12A (PPH00544B), IL-6

1 (PPH00560C) and IL-1 $\beta$  (PPH00171C).

2

3 ***THP-1 uptake NDMV and NDTR.*** Isolated NDTRs and NDMVs from neutrophils pre-stained  
4 with cell tracker green (5  $\mu$ g/ml) were exposed to M0-differentiated THP-1 cells on confocal  
5 dish. The cell movements were visualized using immunofluorescence microscopy at 37  $\bullet$ , 5%  
6 CO<sub>2</sub> for 1 h.

7

8 ***miRNA array and validation.*** RNA was isolated from EVs using miRNeasy Micro Kit (Qiagen)  
9 and cDNA was synthesized with TaqMan MicroRNA reverse transcription kit (Applied  
10 Biosystems). Reactions were performed using a TaqMan Universal Master Mix II (Applied  
11 Biosystems) and TaqMan probe (hsa-miR-24-3p, hsa-miR-29a-3p, hsa-miR-122-5p, hsa-miR-  
12 126-3p, hsa-miR-150-5p, hsa-miR-451a, hsa-miR-1260a, hsa-miR-1285-5p, hsa-miR-4454, hsa-  
13 miR-7975). Cel-miR-39 was added as an exogenous control for normalization. The miRNA  
14 profile of samples was analyzed with Nanostring nCounter<sup>TM</sup> system. To validate the effects of  
15 miRNAs on the phenotype polarization of macrophages, M0-differentiated THP-1 cells were  
16 transfected with miRNA mimics (hsa-miR-1285-5p, hsa-miR-1505p, hsa-miR-451a, hsa-miR-  
17 1260a, hsa-miR-4454, hsa-miR-7975, and hsa-miR-126-3p, abm) using NEPA21 (NEPA gene).  
18 RNA was extracted and the expression of iNOS and arginase was measured using quantitative  
19 PCR.

20

21 ***Animal experiments.*** Animal experiments were approved by the Institutional Animal Care and

1 Use Committee of Kyungpook National University and Hallym University. BALB/c (male, 5-8  
2 weeks old) mice were purchased from Orient Bio. Mouse neutrophils were isolated from bone  
3 marrow of healthy mouse using neutrophil enrichment kit (Miltenyi Biotec) or EasySep™ mouse  
4 neutrophil enrichment kit (StemCell technologies) as previously described (Park et al., 2017).  
5 EVs were isolated from neutrophils stimulated with *E. coli*. Experimental sepsis was induced in  
6 BALB/c mice by the cecal ligation and puncture (CLP) procedure as previously described (Yan  
7 et al., 2004). BALB/c mice were treated with either NDTRs (100 µl, i.p.), NDMVs (100 µl, i.p.)  
8 or vehicle (saline, 100 µl, i.p.) 30 min before CLP surgery, and further treated on day 1, 2, and 3  
9 after CLP surgery. The survival of septic mice were monitored for 9 days. DSS-induced chronic  
10 colitis was performed according to previous study (Marcon et al., 2013). In brief, BALB/c mice  
11 received water containing 2% DSS during first 5 days and further received normal drinking  
12 water for 10 days. At day 16, mice were exposed to water containing 2% DSS again until day 22.  
13 Mice were treated with NDTRs and NDMVs intraperitoneally on days 16, 18, 20, and 22.

14

15 **Histological analysis** Colon were removed at day 22 after DSS-induced colitis, fixed with 4%  
16 formaldehyde solution (Biosesang), embedded in paraffin, and stained with hematoxylin (Dako  
17 Mayer's Hematoxylin, Agilent) and eosin. (Daejung chemical and metal Co Ltd.). Histological  
18 analysis were performed as previously described (Marcon et al., 2013). In brief, epithelial  
19 hyperplasia, mononuclear cells and polymorphonuclear cell infiltration in lamina propria, crypt  
20 inflammation, epithelial hyperplasia, and erythrocyte loss were scored..

21

22 **Serum evaluation.** Serum obtained from sepsis patients who admitted to the intensive care unit



1 of Kyungpook National University Hospital between April and October 2016. All patients  
2 provided informed consents in accordance with the Declaration of Helsinki. Serum were  
3 obtained from healthy volunteers or sepsis patients and further were filtered through 1.2  $\mu$ M  
4 filter. The filtrate were then treated with 5 $\mu$ l of ExoQuick (System Biosciences), incubated for  
5 30 mins at 4 °C, followed by high-speed centrifugation (11,600 rpm for 1 hr). The pellets were  
6 then fixed and stained with Annexin V (FITC) and CD16 (PE) antibody.

7

8 ***Statistical analysis.*** Data are presented as the mean  $\pm$  SEM for continuous variables and as the  
9 number (%) for the categorical variables. Comparisons between two groups were performed with  
10 either two-tailed Student's t test (parametric) or Mann-Whitney (non-parametric test). Survival  
11 data were analyzed using Mantel-Cox log-rank test. Values of  $P < 0.05$  were considered to  
12 indicate statistical significance. Statistical data were analyzed by Graphpad prism 7.0 (GraphPad  
13 Software Inc.).

14

15 A detailed description of all methods is available in **supplementary information**.

16

17

1 **REFERENCES**

- 2 Amulic, B., Cazalet, C., Hayes, G.L., Metzler, K.D., and Zychlinsky, A. (2012). Neutrophil  
3 function: from mechanisms to disease. *Annu Rev Immunol* 30, 459-489.
- 4 Armstrong, D.A., Nymon, A.B., Ringelberg, C.S., Lesseur, C., Hazlett, H.F., Howard, L., Marsit,  
5 C.J., and Ashare, A. (2017). Pulmonary microRNA profiling: implications in upper lobe  
6 predominant lung disease. *Clin Epigenetics* 9, 56.
- 7 Camussi, G., Deregibus, M.C., Bruno, S., Cantaluppi, V., and Biancone, L. (2010).  
8 Exosomes/microvesicles as a mechanism of cell-to-cell communication. *Kidney Int* 78, 838-  
9 848.
- 10 Cobos Jimenez, V., Bradley, E.J., Willemsen, A.M., van Kampen, A.H., Baas, F., and Kootstra,  
11 N.A. (2014). Next-generation sequencing of microRNAs uncovers expression signatures in  
12 polarized macrophages. *Physiol Genomics* 46, 91-103.
- 13 Dalli, J., Montero-Melendez, T., Norling, L.V., Yin, X., Hinds, C., Haskard, D., Mayr, M., and  
14 Perretti, M. (2013). Heterogeneity in neutrophil microparticles reveals distinct proteome and  
15 functional properties. *Mol Cell Proteomics* 12, 2205-2219.
- 16 Dalli, J., Norling, L.V., Renshaw, D., Cooper, D., Leung, K.Y., and Perretti, M. (2008). Annexin  
17 1 mediates the rapid anti-inflammatory effects of neutrophil-derived microparticles. *Blood*  
18 112, 2512-2519.
- 19 Derrick, T., Ramadhani, A.M., Mtengai, K., Massae, P., Burton, M.J., and Holland, M.J. (2017).  
20 miRNAs that associate with conjunctival inflammation and ocular Chlamydia trachomatis  
21 infection do not predict progressive disease. *Pathog Dis* 75.
- 22 Derrick, T., Roberts, C., Rajasekhar, M., Burr, S.E., Joof, H., Makalo, P., Bailey, R.L., Mabey,  
23 D.C., Burton, M.J., and Holland, M.J. (2013). Conjunctival MicroRNA expression in

- 1 inflammatory trachomatous scarring. *PLoS Negl Trop Dis* 7, e2117.
- 2 Duarte, T.A., Noronha-Dutra, A.A., Nery, J.S., Ribeiro, S.B., Pitanga, T.N., Lapa, E.S.J.R.,  
3 Arruda, S., and Boechat, N. (2012). Mycobacterium tuberculosis-induced neutrophil  
4 ectosomes decrease macrophage activation. *Tuberculosis (Edinb)* 92, 218-225.
- 5 Eken, C., Gasser, O., Zenhausern, G., Oehri, I., Hess, C., and Schifferli, J.A. (2008).  
6 Polymorphonuclear neutrophil-derived ectosomes interfere with the maturation of monocyte-  
7 derived dendritic cells. *J Immunol* 180, 817-824.
- 8 Eken, C., Martin, P.J., Sadallah, S., Treves, S., Schaller, M., and Schifferli, J.A. (2010).  
9 Ectosomes released by polymorphonuclear neutrophils induce a MerTK-dependent anti-  
10 inflammatory pathway in macrophages. *J Biol Chem* 285, 39914-39921.
- 11 Eken, C., Sadallah, S., Martin, P.J., Treves, S., and Schifferli, J.A. (2013). Ectosomes of  
12 polymorphonuclear neutrophils activate multiple signaling pathways in macrophages.  
13 *Immunobiology* 218, 382-392.
- 14 Escate, R., Padro, T., and Badimon, L. (2016). LDL accelerates monocyte to macrophage  
15 differentiation: Effects on adhesion and anoikis. *Atherosclerosis* 246, 177-186.
- 16 Fabbri, M., Paone, A., Calore, F., Galli, R., Gaudio, E., Santhanam, R., Lovat, F., Fadda, P., Mao,  
17 C., Nuovo, G.J., *et al.* (2012). MicroRNAs bind to Toll-like receptors to induce prometastatic  
18 inflammatory response. *Proc Natl Acad Sci U S A* 109, E2110-2116.
- 19 Fell, L.H., Seiler-Mussler, S., Sellier, A.B., Rotter, B., Winter, P., Sester, M., Fliser, D., Heine,  
20 G.H., and Zawada, A.M. (2016). Impact of individual intravenous iron preparations on the  
21 differentiation of monocytes towards macrophages and dendritic cells. *Nephrol Dial*  
22 *Transplant* 31, 1835-1845.
- 23 Gasser, O., Hess, C., Miot, S., Deon, C., Sanchez, J.C., and Schifferli, J.A. (2003).

- 1 Characterisation and properties of ectosomes released by human polymorphonuclear  
2 neutrophils. *Exp Cell Res* 285, 243-257.
- 3 Gasser, O., and Schifferli, J.A. (2004). Activated polymorphonuclear neutrophils disseminate  
4 anti-inflammatory microparticles by ectocytosis. *Blood* 104, 2543-2548.
- 5 Gasser, O., and Schifferli, J.A. (2005). Microparticles released by human neutrophils adhere to  
6 erythrocytes in the presence of complement. *Exp Cell Res* 307, 381-387.
- 7 Graff, J.W., Dickson, A.M., Clay, G., McCaffrey, A.P., and Wilson, M.E. (2012). Identifying  
8 functional microRNAs in macrophages with polarized phenotypes. *J Biol Chem* 287, 21816-  
9 21825.
- 10 Harris, T.A., Yamakuchi, M., Ferlito, M., Mendell, J.T., and Lowenstein, C.J. (2008).  
11 MicroRNA-126 regulates endothelial expression of vascular cell adhesion molecule 1. *Proc*  
12 *Natl Acad Sci U S A* 105, 1516-1521.
- 13 Headland, S.E., Jones, H.R., Norling, L.V., Kim, A., Souza, P.R., Corsiero, E., Gil, C.D.,  
14 Nerviani, A., Dell'Accio, F., Pitzalis, C., *et al.* (2015). Neutrophil-derived microvesicles enter  
15 cartilage and protect the joint in inflammatory arthritis. *Sci Transl Med* 7, 315ra190.
- 16 Hess, C., Sadallah, S., Hefti, A., Landmann, R., and Schifferli, J.A. (1999). Ectosomes released  
17 by human neutrophils are specialized functional units. *J Immunol* 163, 4564-4573.
- 18 Hong, C.W., Kim, T.K., Ham, H.Y., Nam, J.S., Kim, Y.H., Zheng, H., Pang, B., Min, T.K., Jung,  
19 J.S., Lee, S.N., *et al.* (2010). Lysophosphatidylcholine increases neutrophil bactericidal  
20 activity by enhancement of azurophil granule-phagosome fusion via glycine.GlyR alpha  
21 2/TRPM2/p38 MAPK signaling. *J Immunol* 184, 4401-4413.
- 22 Hong, Y., Eleftheriou, D., Hussain, A.A., Price-Kuehne, F.E., Savage, C.O., Jayne, D., Little,  
23 M.A., Salama, A.D., Klein, N.J., and Brogan, P.A. (2012). Anti-neutrophil cytoplasmic

- 1 antibodies stimulate release of neutrophil microparticles. *J Am Soc Nephrol* 23, 49-62.
- 2 Hyun, Y.M., and Hong, C.W. (2017). Deep insight into neutrophil trafficking in various organs. *J*  
3 *Leukoc Biol* 102, 617-629.
- 4 Hyun, Y.M., Sumagin, R., Sarangi, P.P., Lomakina, E., Overstreet, M.G., Baker, C.M., Fowell,  
5 D.J., Waugh, R.E., Sarelius, I.H., and Kim, M. (2012). Uropod elongation is a common final  
6 step in leukocyte extravasation through inflamed vessels. *J Exp Med* 209, 1349-1362.
- 7 Johnson, B.L., 3rd, Midura, E.F., Prakash, P.S., Rice, T.C., Kunz, N., Kalies, K., and Caldwell,  
8 C.C. (2017). Neutrophil derived microparticles increase mortality and the counter-  
9 inflammatory response in a murine model of sepsis. *Biochim Biophys Acta Mol Basis Dis*  
10 *1863*, 2554-2563.
- 11 Kambas, K., Chrysanthopoulou, A., Vassilopoulos, D., Apostolidou, E., Skendros, P., Girod, A.,  
12 Arelaki, S., Froudarakis, M., Nakopoulou, L., Giatromanolaki, A., *et al.* (2014). Tissue factor  
13 expression in neutrophil extracellular traps and neutrophil derived microparticles in  
14 antineutrophil cytoplasmic antibody associated vasculitis may promote thromboinflammation  
15 and the thrombophilic state associated with the disease. *Ann Rheum Dis* 73, 1854-1863.
- 16 Kowal, J., Arras, G., Colombo, M., Jouve, M., Morath, J.P., Primdal-Bengtson, B., Dingli, F.,  
17 Loew, D., Tkach, M., and Thery, C. (2016). Proteomic comparison defines novel markers to  
18 characterize heterogeneous populations of extracellular vesicle subtypes. *Proc Natl Acad Sci*  
19 *U S A* 113, E968-977.
- 20 Lee, Y., Ka, S.O., Cha, H.N., Chae, Y.N., Kim, M.K., Park, S.Y., Bae, E.J., and Park, B.H. (2017).  
21 Myeloid Sirtuin 6 Deficiency Causes Insulin Resistance in High-Fat Diet-Fed Mice by  
22 Eliciting Macrophage Polarization Toward an M1 Phenotype. *Diabetes* 66, 2659-2668.
- 23 Lim, K., Hyun, Y.M., Lambert-Emo, K., Capece, T., Bae, S., Miller, R., Topham, D.J., and Kim,

- 1 M. (2015). Neutrophil trails guide influenza-specific CD8(+) T cells in the airways. *Science*  
2 349, aaa4352.
- 3 Lin, J.B., Moolani, H.V., Sene, A., Sidhu, R., Kell, P., Lin, J.B., Dong, Z., Ban, N., Ory, D.S.,  
4 and Apte, R.S. (2018). Macrophage microRNA-150 promotes pathological angiogenesis as  
5 seen in age-related macular degeneration. *JCI Insight* 3.
- 6 Lotvall, J., Hill, A.F., Hochberg, F., Buzas, E.I., Di Vizio, D., Gardiner, C., Gho, Y.S., Kurochkin,  
7 I.V., Mathivanan, S., Quesenberry, P., *et al.* (2014). Minimal experimental requirements for  
8 definition of extracellular vesicles and their functions: a position statement from the  
9 International Society for Extracellular Vesicles. *J Extracell Vesicles* 3, 26913.
- 10 Manoharan, P., Basford, J.E., Pilcher-Roberts, R., Neumann, J., Hui, D.Y., and Lingrel, J.B.  
11 (2014). Reduced levels of microRNAs miR-124a and miR-150 are associated with increased  
12 proinflammatory mediator expression in Kruppel-like factor 2 (KLF2)-deficient  
13 macrophages. *J Biol Chem* 289, 31638-31646.
- 14 Marcon, R., Bento, A.F., Dutra, R.C., Bicca, M.A., Leite, D.F., and Calixto, J.B. (2013). Maresin  
15 1, a proresolving lipid mediator derived from omega-3 polyunsaturated fatty acids, exerts  
16 protective actions in murine models of colitis. *J Immunol* 191, 4288-4298.
- 17 Martinez, F.O., and Gordon, S. (2014). The M1 and M2 paradigm of macrophage activation:  
18 time for reassessment. *F1000Prime Rep* 6, 13.
- 19 Meng, Q.L., Liu, F., Yang, X.Y., Liu, X.M., Zhang, X., Zhang, C., and Zhang, Z.D. (2014).  
20 Identification of latent tuberculosis infection-related microRNAs in human U937  
21 macrophages expressing *Mycobacterium tuberculosis* Hsp16.3. *BMC Microbiol* 14, 37.
- 22 Mesri, M., and Altieri, D.C. (1998). Endothelial cell activation by leukocyte microparticles. *J*  
23 *Immunol* 161, 4382-4387.

- 1 Mesri, M., and Altieri, D.C. (1999). Leukocyte microparticles stimulate endothelial cell cytokine  
2 release and tissue factor induction in a JNK1 signaling pathway. *J Biol Chem* *274*, 23111-  
3 23118.
- 4 Momen-Heravi, F., Bala, S., Kodys, K., and Szabo, G. (2015). Exosomes derived from alcohol-  
5 treated hepatocytes horizontally transfer liver specific miRNA-122 and sensitize monocytes  
6 to LPS. *Sci Rep* *5*, 9991.
- 7 Nauseef, W.M. (2016). Neutrophils, from cradle to grave and beyond. *Immunol Rev* *273*, 5-10.
- 8 Nauseef, W.M., and Borregaard, N. (2014). Neutrophils at work. *Nat Immunol* *15*, 602-611.
- 9 Nieuwland, R., Berckmans, R.J., McGregor, S., Boing, A.N., Romijn, F.P., Westendorp, R.G.,  
10 Hack, C.E., and Sturk, A. (2000). Cellular origin and procoagulant properties of  
11 microparticles in meningococcal sepsis. *Blood* *95*, 930-935.
- 12 Nolan, S., Dixon, R., Norman, K., Hellewell, P., and Ridger, V. (2008). Nitric oxide regulates  
13 neutrophil migration through microparticle formation. *Am J Pathol* *172*, 265-273.
- 14 O'Connell, R.M., Rao, D.S., Chaudhuri, A.A., and Baltimore, D. (2010). Physiological and  
15 pathological roles for microRNAs in the immune system. *Nat Rev Immunol* *10*, 111-122.
- 16 Park, S.Y., Shrestha, S., Youn, Y.J., Kim, J.K., Kim, S.Y., Kim, H.J., Park, S.H., Ahn, W.G., Kim,  
17 S., Lee, M.G., *et al.* (2017). Autophagy Primes Neutrophils for Neutrophil Extracellular Trap  
18 Formation during Sepsis. *Am J Respir Crit Care Med* *196*, 577-589.
- 19 Pitanga, T.N., de Aragao Franca, L., Rocha, V.C., Meirelles, T., Borges, V.M., Goncalves, M.S.,  
20 Pontes-de-Carvalho, L.C., Noronha-Dutra, A.A., and dos-Santos, W.L. (2014). Neutrophil-  
21 derived microparticles induce myeloperoxidase-mediated damage of vascular endothelial  
22 cells. *BMC Cell Biol* *15*, 21.
- 23 Pliyev, B.K., Kalintseva, M.V., Abdulaeva, S.V., Yarygin, K.N., and Savchenko, V.G. (2014).

- 1 Neutrophil microparticles modulate cytokine production by natural killer cells. *Cytokine* 65,  
2 126-129.
- 3 Pluskota, E., Woody, N.M., Szpak, D., Ballantyne, C.M., Soloviev, D.A., Simon, D.I., and Plow,  
4 E.F. (2008). Expression, activation, and function of integrin alphaMbeta2 (Mac-1) on  
5 neutrophil-derived microparticles. *Blood* 112, 2327-2335.
- 6 Prakash, P.S., Caldwell, C.C., Lentsch, A.B., Pritts, T.A., and Robinson, B.R. (2012). Human  
7 microparticles generated during sepsis in patients with critical illness are neutrophil-derived  
8 and modulate the immune response. *J Trauma Acute Care Surg* 73, 401-406; discussion 406-  
9 407.
- 10 Repnik, U., Knezevic, M., and Jeras, M. (2003). Simple and cost-effective isolation of  
11 monocytes from buffy coats. *J Immunol Methods* 278, 283-292.
- 12 Rhys, H.I., Dell'Accio, F., Pitzalis, C., Moore, A., Norling, L.V., and Perretti, M. (2018).  
13 Neutrophil Microvesicles from Healthy Control and Rheumatoid Arthritis Patients Prevent  
14 the Inflammatory Activation of Macrophages. *EBioMedicine* 29, 60-69.
- 15 Saha, B., Momen-Heravi, F., Kodys, K., and Szabo, G. (2016). MicroRNA Cargo of  
16 Extracellular Vesicles from Alcohol-exposed Monocytes Signals Naive Monocytes to  
17 Differentiate into M2 Macrophages. *J Biol Chem* 291, 149-159.
- 18 Schneider, C.A., Rasband, W.S., and Eliceiri, K.W. (2012). NIH Image to ImageJ: 25 years of  
19 image analysis. *Nat Methods* 9, 671-675.
- 20 Serhan, C.N., Chiang, N., and Van Dyke, T.E. (2008). Resolving inflammation: dual anti-  
21 inflammatory and pro-resolution lipid mediators. *Nat Rev Immunol* 8, 349-361.
- 22 Seveau, S., Eddy, R.J., Maxfield, F.R., and Pierini, L.M. (2001). Cytoskeleton-dependent  
23 membrane domain segregation during neutrophil polarization. *Mol Biol Cell* 12, 3550-3562.



- 1 Shantikumar, S., Caporali, A., and Emanuelli, C. (2012). Role of microRNAs in diabetes and its  
2 cardiovascular complications. *Cardiovasc Res* 93, 583-593.
- 3 Slater, T.W., Finkielstein, A., Mascarenhas, L.A., Mehl, L.C., Butin-Israeli, V., and Sumagin, R.  
4 (2017). Neutrophil Microparticles Deliver Active Myeloperoxidase to Injured Mucosa To  
5 Inhibit Epithelial Wound Healing. *J Immunol* 198, 2886-2897.
- 6 Soehnlein, O., Steffens, S., Hidalgo, A., and Weber, C. (2017). Neutrophils as protagonists and  
7 targets in chronic inflammation. *Nat Rev Immunol* 17, 248-261.
- 8 Stein, J.M., and Luzio, J.P. (1991). Ectocytosis caused by sublytic autologous complement attack  
9 on human neutrophils. The sorting of endogenous plasma-membrane proteins and lipids into  
10 shed vesicles. *Biochem J* 274 ( Pt 2), 381-386.
- 11 Thery, C., Ostrowski, M., and Segura, E. (2009). Membrane vesicles as conveyors of immune  
12 responses. *Nat Rev Immunol* 9, 581-593.
- 13 Timar, C.I., Lorincz, A.M., Csepanyi-Komi, R., Valyi-Nagy, A., Nagy, G., Buzas, E.I., Ivanyi, Z.,  
14 Kittel, A., Powell, D.W., McLeish, K.R., and Ligeti, E. (2013). Antibacterial effect of  
15 microvesicles released from human neutrophilic granulocytes. *Blood* 121, 510-518.
- 16 Tkach, M., Kowal, J., and Thery, C. (2018). Why the need and how to approach the functional  
17 diversity of extracellular vesicles. *Philos Trans R Soc Lond B Biol Sci* 373.
- 18 Valadi, H., Ekstrom, K., Bossios, A., Sjostrand, M., Lee, J.J., and Lotvall, J.O. (2007). Exosome-  
19 mediated transfer of mRNAs and microRNAs is a novel mechanism of genetic exchange  
20 between cells. *Nat Cell Biol* 9, 654-659.
- 21 van de Winkel, J.G., and Capel, P.J. (1993). Human IgG Fc receptor heterogeneity: molecular  
22 aspects and clinical implications. *Immunol Today* 14, 215-221.
- 23 van der Pol, E., Boing, A.N., Gool, E.L., and Nieuwland, R. (2016). Recent developments in the

- 1 nomenclature, presence, isolation, detection and clinical impact of extracellular vesicles. *J*  
2 *Thromb Haemost 14*, 48-56.
- 3 van der Pol, E., Boing, A.N., Harrison, P., Sturk, A., and Nieuwland, R. (2012). Classification,  
4 functions, and clinical relevance of extracellular vesicles. *Pharmacol Rev 64*, 676-705.
- 5 Xu, Y., Romero, R., Miller, D., Kadam, L., Mial, T.N., Plazyo, O., Garcia-Flores, V., Hassan, S.S.,  
6 Xu, Z., Tarca, A.L., *et al.* (2016). An M1-like Macrophage Polarization in Decidual Tissue  
7 during Spontaneous Preterm Labor That Is Attenuated by Rosiglitazone Treatment. *J*  
8 *Immunol 196*, 2476-2491.
- 9 Yan, J.J., Jung, J.S., Lee, J.E., Lee, J., Huh, S.O., Kim, H.S., Jung, K.C., Cho, J.Y., Nam, J.S.,  
10 Suh, H.W., *et al.* (2004). Therapeutic effects of lysophosphatidylcholine in experimental  
11 sepsis. *Nat Med 10*, 161-167.
- 12 Zhang, Y.L., Li, Q., Yang, X.M., Fang, F., Li, J., Wang, Y.H., Yang, Q., Zhu, L., Nie, H.Z., Zhang,  
13 X.L., *et al.* (2018). SPON2 Promotes M1-like Macrophage Recruitment and Inhibits  
14 Hepatocellular Carcinoma Metastasis by Distinct Integrin-Rho GTPase-Hippo Pathways.  
15 *Cancer Res 78*, 2305-2317.

## 1 Figures & Figure legends

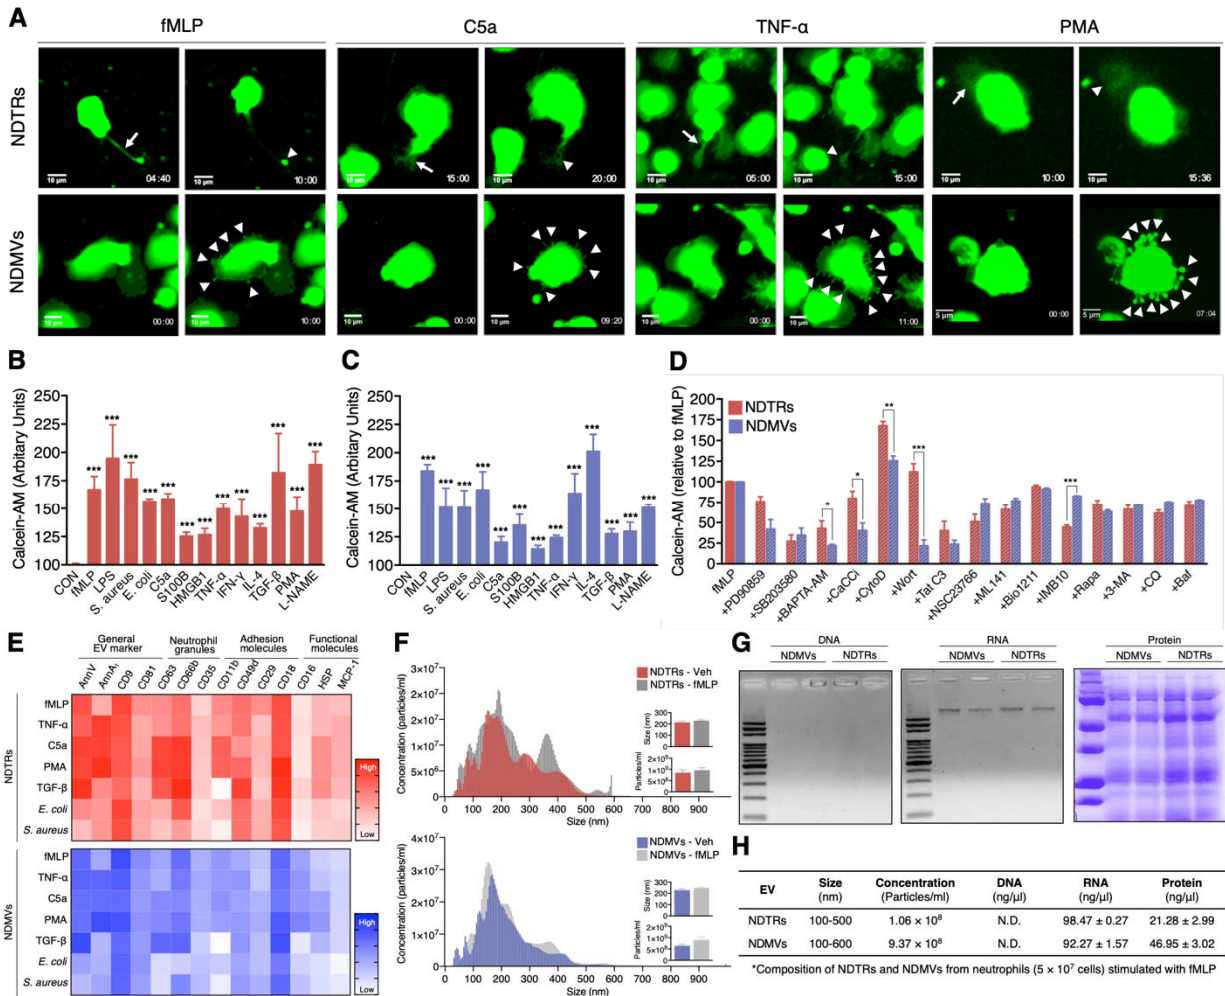

2

3 **Figure 1. Characterization of NDRTs and NDMVs** (A) Representative time-lapse images of

4 EVs released from neutrophils. The time denotes minutes after stimulation. The arrows indicate

5 elongated uropods. The arrowheads indicate deposited neutrophil-derived EVs. (B-D)

6 Quantification of relative amounts of generated neutrophil-derived EVs. Neutrophils were

7 stained with calcein-AM and stimulated with the indicated stimulators.  $n = 4-7$  per group. (B-C)

8 Relative fluorescence normalized to the fluorescence of EVs isolated from unstimulated

9 neutrophils. (D) Neutrophils were stimulated with fMLP in the presence or absence of the

10 indicated inhibitors. Relative fluorescence normalized to the fluorescence of EVs isolated from

1 fMLP-stimulated neutrophils. (E) Heatmap of marker expression levels. n = 3. (F)  
2 Representative density plots of neutrophil-derived EVs. (G-H) Validation of the contents in  
3 neutrophil-derived EVs. All data are representative of more than three independent experiments  
4 with n = 3 per group. The data shown are the mean  $\pm$  SEM. (B-C) \*\*\*P < 0.001 vs control. (D)  
5 \*P < 0.05; \*\*P < 0.01; \*\*\*P < 0.001.

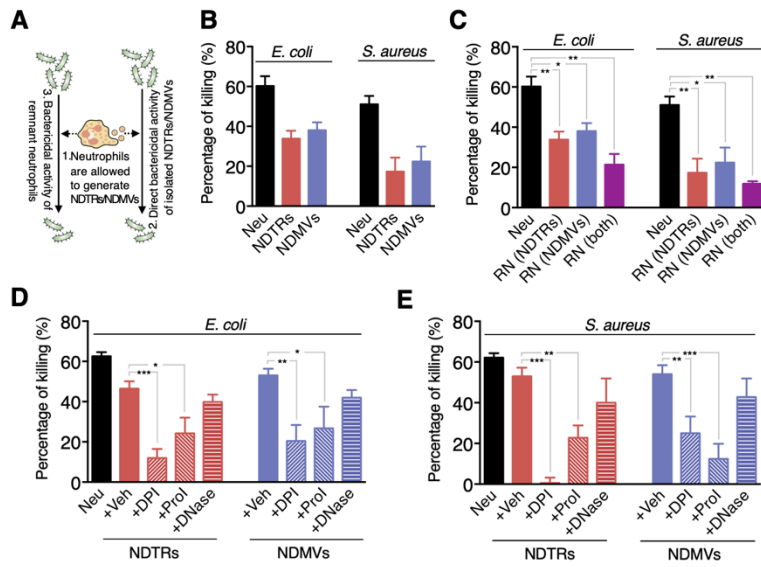

1  
 2 **Figure 2. NDTRs and NDMVs exert direct bactericidal activity** (A) Schematic of the  
 3 experiments. (B) Direct bactericidal activity of neutrophil-derived EVs. (C) Bactericidal activity  
 4 of RNs after the formation of neutrophil-derived EVs. (D-E) The effects of inhibitors of the  
 5 specific bactericidal activity pathways on the bactericidal activity of neutrophil-derived EVs. The  
 6 data are pooled from three independent experiments (n = 4–7 per each group) and shown as the  
 7 mean ± SEM. \*P < 0.05; \*\*P < 0.01; \*\*\*P < 0.001.

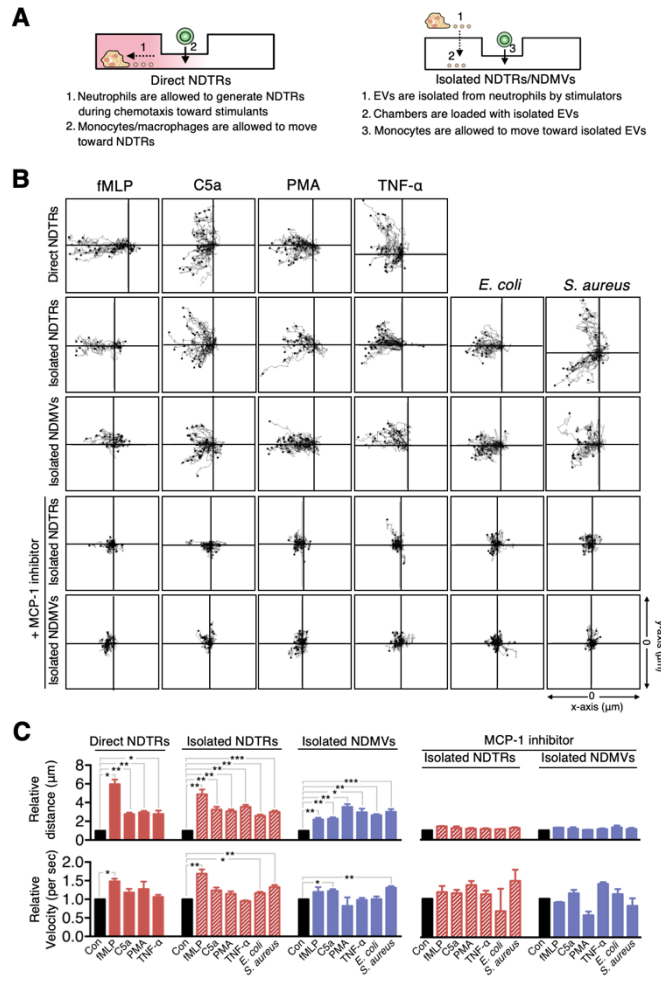

1

2 **Figure 3. NDTRs and NDMVs induce monocyte chemotaxis via an MCP-1-dependent**

3 **pathway** (A) Schematic of the chemotaxis experiments. (B) Monocyte migration tracking

4 analysis. The distances traveled by migrating cells were tracked on every minute for 45 min.

5 Representative tracking results of thirty cells per each group are presented. (C) Relative mean

6 distance and relative mean velocity of monocytes traveled towards neutrophil-derived EVs. (B-C)

7 Direct NDTRs: neutrophils were allowed to generate NDTRs in a fibronectin-coated  $\mu$ -slide

8 chamber, and the movements of monocytes was measured. Isolated NDTRs and NDMVs: the

9 lane was coated with isolated neutrophil-derived EVs, and the movement of monocytes was

10 measured. MCP-1 inhibition: monocytes were loaded into the lane in the presence of a CCR-2

- 1 antagonist. The data are shown as the mean  $\pm$  SEM. \*P < 0.05; \*\*P < 0.01; \*\*\*P < 0.001. All
- 2 data are representative of three independent experiments (n = 3–4 per group).

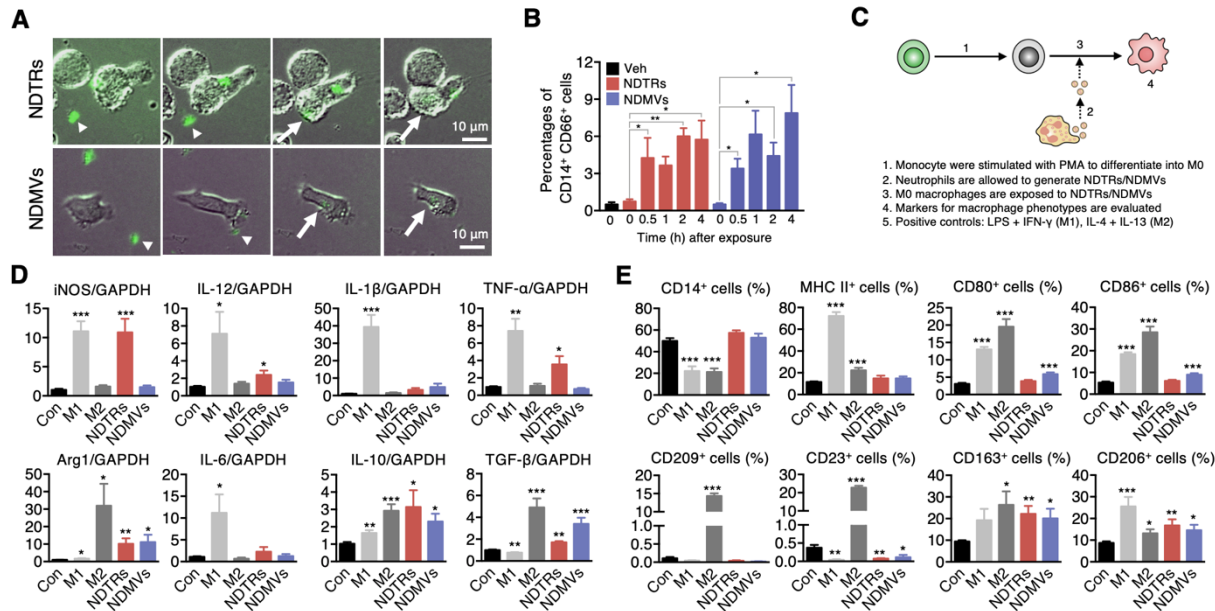

1  
 2 **Figure 4. Differential effects of NDTRs and NDMVs on macrophage phenotype**  
 3 **polarization** (A) Time-lapse images of M0-differentiated THP-1 cells acquiring neutrophil-  
 4 derived EVs. Green, neutrophil-derived EVs stained with Cell Tracker Green. Arrowheads,  
 5 neutrophil-derived EVs attached to the plates. Arrows, neutrophil-derived EVs phagocytosed by  
 6 M0-differentiated THP-1 cells. Representative images of three independent experiments. (B)  
 7 FACS analysis showing the uptake of neutrophil-derived EVs by M0-differentiated THP-1 cells.  
 8 n = 3. (C) Schematic of the phenotype polarization experiments. (D-E) The expression of M1  
 9 and M2 macrophage-associated markers in M0-differentiated THP-1 cells exposed to neutrophil-  
 10 derived EVs (n = 3–4 per each group). The data are shown as the mean ± SEM. \*P < 0.05; \*\*P <  
 11 0.01; \*\*\*P < 0.001 compared to control.



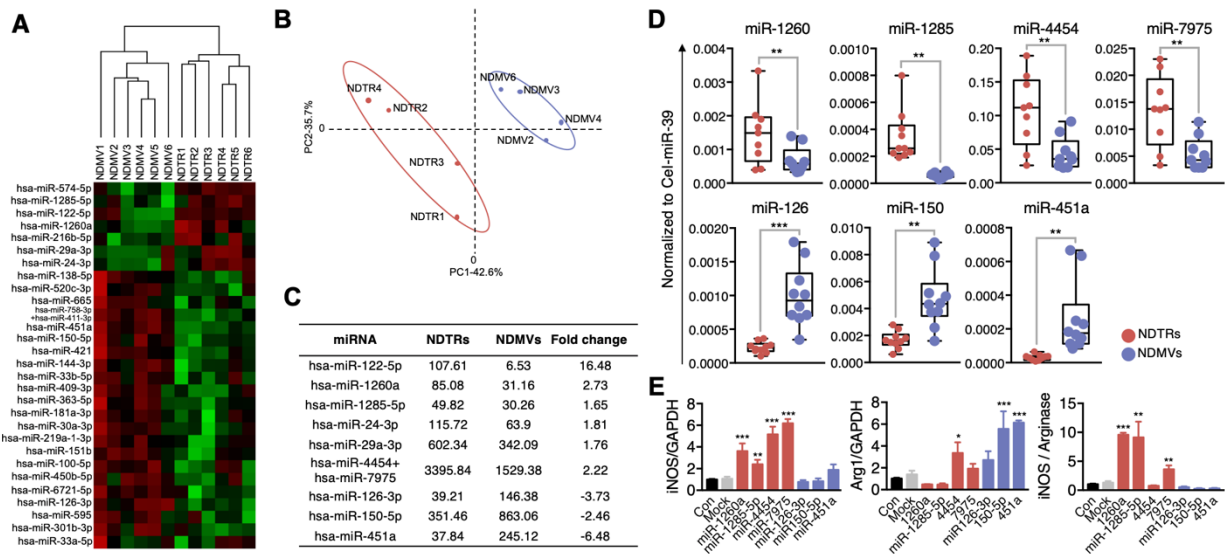

1  
2 **Figure 5. Differential miRNA profiles in NDTRs and NDMVs** (A) Hierarchical clustering of  
3 differentially expressed miRNAs in NDTRs and NDMVs. The miRNA profiles of NDTRs and  
4 NDMVs (n = 6 per group) clustered. Cluster analysis based on log<sub>10</sub>-transformed data. A red  
5 color represents relatively higher expression and a green color represents relatively lower  
6 expression. (B) Principal component analysis (PCA) plot of the miRNA expression profiles of  
7 NDTRs and NDMVs. (C) Summary of selected miRNAs differentially expressed in NDTRs and  
8 NDMVs. (D) Validation of selected miRNAs in NDTRs and NDMVs using RT-PCR (n = 10 per  
9 each group). (E) The effects of miRNA mimics (miR-1260a, miR-1285-5p, miR-4454, miR-  
10 7975, miR-126-3p, miR-150p, and miR-451a) on the iNOS and arginase expression in M0-  
11 differentiated THP-1 cells (n = 3). The data are shown as the mean ± SEM. \*P < 0.05; \*\*P <  
12 0.01; \*\*\*P < 0.001.

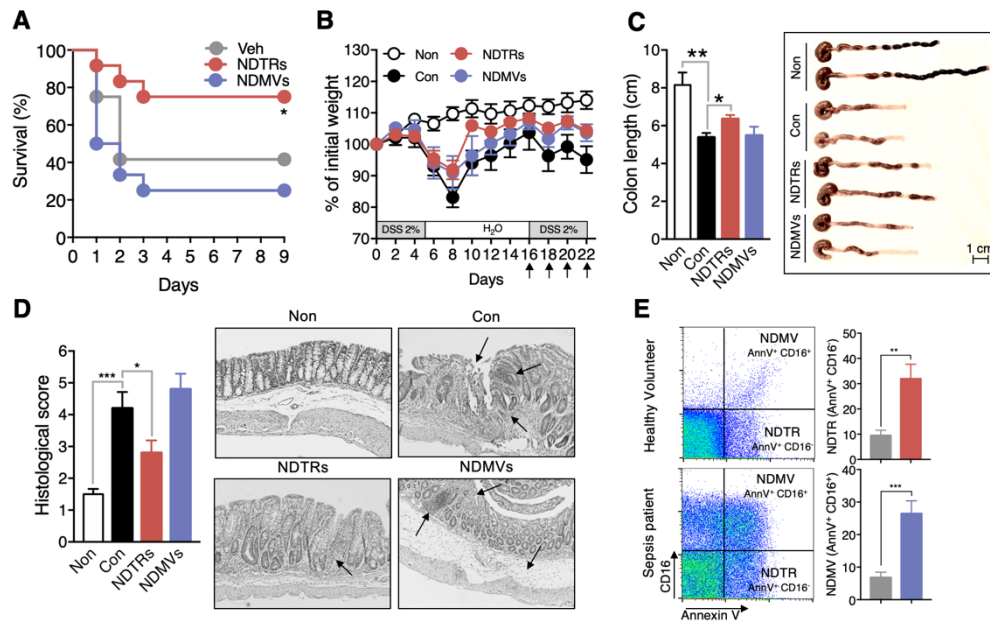

**Figure 6. Differential effects of NDTRs and NDMVs in murine models of inflammation. (A)**

Effects of NDTRs and NDMVs in a murine model of sepsis. Experimental sepsis was induced by CLP. (A) Survival rates of septic mice after the administration of neutrophil-derived EVs.

BALB/c mice were administered an i.p. injection of either NDTRs (n = 8), NDMVs (n = 12) or vehicle (saline, n = 12) 1 h before surgery and on days 1 and 3 after surgery. \*P < 0.05 compared to vehicle.

(B-E) The effects of NDTRs and NDMVs in a murine model of chronic colitis. Mice were administered with two cycles of 2% DSS for 5 days. At the beginning of the second cycle, mice were treated with NDTRs and NDMVs on every 2 days. n = 4 per each group. (B)

Percentage of initial weight. (C-D) Mice were sacrificed on day 22 and subjected to evaluation. (C) Left panel, colon length. Right panel, representative photographs of the colon and cecum. (D)

Macroscopic colonic damage. Left panel, histological score. Right panel, representative images of hematoxylin and eosin (H&E) staining. The arrows indicate crypt damage and inflammatory cell infiltration.

(E) The identification of neutrophil-derived EVs in plasma of sepsis patients. EVs were isolated from plasma of either healthy volunteers (n = 4) or sepsis patients (n = 12),

- 1 and stained with AnnV and CD16. Left panel, representative scatter plot. Right panel, the
- 2 percentages of NDTRs and NDMVs.
